1 *Title:* Molecular dating of the emergence of anaerobic rumen fungi and the impact of laterally  
2 acquired genes

3

4 *Short title:* Molecular dating and HGT of anaerobic gut fungi

5

6 *Authors:* Yan Wang<sup>\*,†</sup>, Noha Youssef<sup>‡</sup>, M.B. Couger<sup>§</sup>, Radwa Hanafy<sup>‡</sup>, Mostafa Elshahed<sup>‡</sup>, Jason  
7 E. Stajich<sup>\*,†</sup>

8

9 *Affiliations:*

10 <sup>\*</sup> Department of Microbiology and Plant Pathology, University of California-Riverside,  
11 Riverside, California, 92521 USA.

12 <sup>†</sup> Institute for Integrative Genome Biology, University of California-Riverside, Riverside,  
13 California, 92521 USA.

14 <sup>‡</sup> Department of Microbiology and Molecular Genetics, Oklahoma State University, Stillwater,  
15 Oklahoma, 74074 USA.

16 <sup>§</sup> High Performance Computing Center, Oklahoma State University, Stillwater, Oklahoma, 74074  
17 USA.

18

19 *To whom correspondence may be addressed:*

Yan Wang  
University of California, Riverside  
Department of Microbiology and Plant  
Pathology  
Riverside, CA 92521 USA  
Phone: +1 951.386.5197  
Email: [yanxw.wang@gmail.com](mailto:yanxw.wang@gmail.com)

Jason E. Stajich  
University of California, Riverside  
Department of Microbiology and Plant  
Pathology  
Riverside, CA 92521 USA  
Phone: +1 951.827.2363  
Email: [jason.stajich@ucr.edu](mailto:jason.stajich@ucr.edu)

20

21 *Keywords:* Comparative genomics, Divergence time estimation, HGT, Intron insertion,

22 Phylogenomics

## 23 **Abstract**

24 The anaerobic gut fungi (AGF) or Neocallimastigomycota inhabit the rumen and alimentary tract  
25 of herbivorous mammals, where they play an important role in the degradation of plant fiber.  
26 Comparative genomic and phylogenomic analysis of the AGF has long been hampered by their  
27 fastidious growth pattern as well as their large and AT-biased genomes. We sequenced 21 AGF  
28 transcriptomes and combined them with 5 available genome sequences of AGF taxa to explore  
29 their evolutionary relationships, time their divergence, and characterize patterns of gene gain/loss  
30 associated with their evolution. We estimate that the most recent common ancestor of the AGF  
31 diverged 66 ( $\pm 10$ ) million years ago, a timeframe that coincides with the evolution of grasses  
32 (Poaceae), as well as the mammalian transition from insectivory to herbivory. The concordance  
33 of these independently estimated ages of AGF evolution, grasses evolution, and mammalian  
34 transition to herbivory suggest that AGF have been important in shaping the success of  
35 mammalian herbivory transition by improving the efficiency of energy acquisition from  
36 recalcitrant plant materials. Comparative genomics identified multiple lineage-specific genes and  
37 protein domains in the AGF, two of which were acquired from an animal host (galectin) and  
38 rumen gut bacteria (carbohydrate-binding domain) via horizontal gene transfer (HGT). Four of  
39 the bacterial derived “Cthe\_2159” genes in AGF genomes also encode eukaryotic Pfam domains  
40 (“Atrophin-1”, “eIF-3\_zeta”, “Nop14”, and “TPH”) indicating possible gene fusion events after  
41 the acquisition of “Cthe\_2159” domain. A third AGF domain, plant-like polysaccharide lyase N-  
42 terminal domain (“Rhamnagal\_lyase”), represents the first report from fungi that potentially aids  
43 AGF to degrade pectin. Analysis of genomic and transcriptomic sequences confirmed the  
44 presence and expression of these lineage-specific genes in nearly all AGF clades supporting the  
45 hypothesis that these laterally acquired and novel genes in fungi are likely functional. These  
46 genetic elements may contribute to the exceptional abilities of AGF to degrade plant biomass and  
47 enable metabolism of the rumen microbes and animal hosts.

## 48 **Introduction**

49 Diverse microbes inhabit the digestive tract of ruminant mammals and contribute to degradation  
50 of ingested plant fibers, a process that liberates nutrients for their hosts. Large scale genomic and  
51 metagenomic sequencing of rumen microbes have produced hundreds of novel bacterial  
52 genomes enabling discovery of plant biomass degrading enzymes and patterns of genomic

53 evolution (Seshadri et al., 2018; Stewart et al., 2018). However, eukaryotic members of the  
54 rumen microbial community have been less intensely studied (Haitjema et al., 2017; Youssef et  
55 al., 2013). Members of the phylum Neocallimastigomycota (anaerobic gut fungi or AGF) are  
56 important members of the rumen and hindgut of a wide range of herbivorous mammals and  
57 reptiles (Gruninger et al., 2014). To survive in this anoxic and prokaryotes-dominated  
58 environment, extant AGF members have undergone multiple structures and metabolic  
59 adaptations, including the loss of the mitochondria, a gain of a hydrogenosome, the loss of  
60 respiratory capacities, and a substitution of ergosterol with tetrahymanol in the cell membrane  
61 (Yarlett et al., 1986). Importantly, all known AGF taxa have a remarkably efficient plant biomass  
62 degradation machinery, which may be critical for competing with other microbes for resources  
63 and establishing growth in the herbivorous gut. Such capacity is reflected in the possession of an  
64 impressive arsenal of plant biomass degradation enzymes and the production of the  
65 cellulosomes—extracellular structures that harbor multiple enzymes bound to scaffoldins  
66 (Haitjema et al., 2017). These metabolic and structural adaptations improve survivability, fitness,  
67 and competitiveness of the AGF in the herbivorous gut, but the genetic and evolutionary origins  
68 of these changes remain largely undescribed (Solomon et al., 2016; Youssef et al., 2013).  
69 Previous genomic investigations of the AGF have identified a massive number of carbohydrate  
70 active enzymes coded by genes with foreign origins presumably from multiple lineages of  
71 bacteria through Horizontal Gene Transfer (HGT) events independently (Haitjema et al., 2017;  
72 Solomon et al., 2016; Youssef et al., 2013). In fact, HGT examples from bacteria to fungi have  
73 been documented extensively (Chaib De Mares et al., 2014; Dhillon et al., 2015; Gardiner et al.,  
74 2012; Pombert et al., 2012). However, HGT elements in fungi that have been transferred from  
75 other eukaryotes are still rare with only a few described cases from animals (Wang et al., 2016),  
76 oomycetes (Sun et al., 2011), or plants (Richards et al., 2009). The rumen is an intriguing context  
77 to explore patterns of HGT, where degradative enzymes break down sorts of cells liberating  
78 DNA and RNA molecules. Competing organisms can find advantage by acquiring foreign genes  
79 that operate efficiently in an anaerobic environment to obtain nutrients from recalcitrant plant  
80 fibers or to recognize other microbes.

81         The Neocallimastigomycota are classified within the Chytridiomycota (chytrid) fungi,  
82 which share the trait of a flagellated zoospore stage (James et al., 2006a, 2006b; Spatafora et al.,  
83 2017; Stajich, 2017). Efforts to resolve the phylogenetic relationship of AGF and their sister

84 lineages using ribosomal markers have yielded conflicting topologies (Liggenstoffer et al., 2010;  
85 Wang et al., 2017). Multilocus phylogeny or phylogenomics has not yet been applied to evaluate  
86 their evolutionary relationships and to estimate the divergence time of the AGF. Using genomes  
87 and transcriptomes from 26 different AGF taxa (Table 1) covering seven out of the ten  
88 recognized genera, we reconstructed a robust phylogenomic tree of the AGF and estimated their  
89 divergence time. We compared the genomes or transcriptomes of AGF and their non-rumen  
90 associated relatives in Chytridiomycota to identify unique and shared genome contents. This  
91 study examined the relatively recent divergence of the AGF clade and revealed a concordance of  
92 the divergence time of the Neocallimastigomycota fungi with both the mammalian hosts  
93 transition to herbivory and the diversification events of the forage grasses. As the AGF are well  
94 known for their exceptional efficiency at plant biomass degradation, we also explored the diverse  
95 genetic components of these fungi. We discovered two potential HGT elements that were found  
96 unique to the AGF, which are predicted to have originated from animals or bacteria. Examination  
97 of the family of bacterial transferred genes revealed multiple intron insertion events that occurred  
98 after the HGT acquisition process, which are present in all five AGF genomes. Comparative  
99 analyses of these genes suggest the intron insert events were related to intragenic duplication of  
100 coding sequences. In addition, a novel plant polysaccharide lyase was revealed from both AGF  
101 genomes and transcriptomes that has never been reported from any known fungal genomes or  
102 genetic studies. The evolutionary genomic investigation of these rumen inhabiting fungi provides  
103 perspective on the concordant timing of their divergence with the ecological niche they inhabit  
104 and the potential role of HGT in accumulation of lineage-specific processes that may contribute  
105 to their unique biology.

## 106 **Results**

### 107 **Divergence time estimation and phylogenomic relationship of Neocallimastigomycota**

108 Phylogenomic analysis placed the 26 AGF taxa into a single monophyletic clade with strong  
109 support of Bayesian posterior probability (1.0/1.0) and maximum likelihood bootstrap value  
110 (100%) (Figure 1 and Figure S1). All AGF genera (*Anaeromyces*, *Caecomycetes*, *Feromyces*,  
111 *Neocallimastix*, *Orpinomyces*, *Pecoromyces*, and *Piromyces*) included in this study formed  
112 individual monophyletic clades that were also supported by both Bayesian (Figure 1) and  
113 maximum likelihood analyses (Figure S1). A conflict in the tree topology between the two

114 phylogenetic reconstructions is the placement of the *Caecomyces* clade. This lineage is sister to  
115 the rest of the Neocallimastigomycota in the maximum likelihood tree (Figure S1), while the  
116 *Caecomyces* position is swapped with *Piromyces* in the Bayesian phylogeny (Figure 1). This is  
117 likely due to short internode distances, which suggest a rapid radiation of the ancestors of the  
118 two genera. The relative short bar of the highest-probability density (HPD) on the node of the  
119 AGF clade (Figure 1) suggests the integrative natural history of this group of fungi and the  
120 outperforming resolving power of the genome-wide data in the molecular dating analyses.

121 The divergence time of the Neocallimastigomycota clade is estimated at the  
122 Cretaceous/Paleogene (K/Pg) boundary 66 ( $\pm 10$ ) Mya (Figure 1). The chronogram (Figure 1)  
123 displays a long branch leading to the emergence of the AGF clade, which extends from the end  
124 of Ediacaran (~564 Mya) to the K/Pg boundary (~66 Mya). This suggests that the extant  
125 members of AGF did not emerge until recently and then rapidly radiated into separate clades in  
126 the Paleogene. The estimated time frame for AGF divergence broadly coincides with the age of  
127 the grasses (70-95 Mya), previously estimated using molecular (nuclear and chloroplast)  
128 markers, and calibrated using fossils from pollen and dinosaur coprolite as well as the breakup  
129 time of the Gondwana (Bremer, 2002; Christin et al., 2014; Gaut, 2002; Prasad et al., 2005;  
130 Vicentini et al., 2008). In addition, this inferred AGF divergence time also coincides with a  
131 major diet change of placental mammals: the transition from a primarily insectivorous to a  
132 herbivorous and omnivorous lifestyles. The loss of chitinase genes diversity, estimated to  
133 occurred from the Cretaceous/Paleogene (K/Pg) boundary (66 Mya) to the mid of Paleogene (34  
134 Mya) (Figure 1), is widely seen as a consequence of such transition (Emerling et al., 2018).  
135 Collectively, these overlapping estimates suggest that the evolution of the symbiotic association  
136 between herbivorous mammals and rumen fungi is tightly linked with the evolution of forage  
137 grasses and mammalian dietary transitions within a 66-95 Mya timeframe. The exact chronology  
138 of these three divergence or transition events cannot be accurately determined partially due to the  
139 intervals of the estimates (Figure 1). However, the dates inferred from phylogenetic analyses are  
140 consistent with the hypothesis that rumen fungi have played important roles in the diet transition  
141 of some mammals to acquire nutrition from forage grasses.

#### 142 **Genome-wide comparison of protein domains and homologous genes**

143 Comparative genomic analysis between AGF and their non-rumen associated chytrid relatives  
144 (Figure 2) identified 40 Pfam domains that are unique to the AGF, representing 0.67% of the

145 total number of Pfams (5,980) in the AGF pan-genome-transcriptome (Table S1 and Figure 2b).  
146 The predicted functions of these domains include anaerobic ribonucleotide reductase (“NRDD”),  
147 metal transport and binding (“FeoA”, “FeoB\_C”), carbohydrate binding (e.g., “CBM\_10”,  
148 “CBM-like”, “Cthe\_2159”), atypical protein kinase (“CotH”), and glycoside hydrolase (e.g.,  
149 “Glyco\_hydro\_6”, “Glyco\_hydro\_11”) (Table S1 and Figure 2b). In addition to these 40 unique  
150 AGF domains, many additional Pfams were also enriched in the AGF. Such domains mediate  
151 polysaccharide degradation and monosaccharide fermentations (Figure 2c), including  
152 “Chitin\_binding\_1”, “CBM\_1”, “Cellulase”, “Glyco\_hydro\_10”, “Gly\_radical”,  
153 “RicinB\_lectin\_2”, “Esterase”, and “Polysacc\_deac\_1” domains. Further, our analysis also  
154 identified 106 Pfam domains that are not present in AGF genomes and transcriptomes but found  
155 in sister Chytridiomycota. Most of these missing domains are related to oxidation reactions on  
156 cytochromes and mitochondria, instead, they possess specialized organelle called  
157 hydrogenosome conducting metabolism in the anaerobic condition (Yarlett et al., 1986) (Table  
158 S1 and Figure 2d). In addition, domains involved in the biosynthesis of nicotinic acid, uric acid,  
159 purine catabolism, photolyase, and pathways of ureidoglycolate and kynurenine are also found to  
160 be absent in AGF species. Similar patterns were also identified in the comparison of homologous  
161 genes (Figure S2).

162 A permissive criterion, allowing some missing copies, found a total of 2,728 gene  
163 families shared between AGF and chytrids. We discovered that 1,709 additional gene families  
164 are shared among AGF genomes (each gene presents in at least 21 out of the total 26 taxa) but  
165 absent in other chytrids, while another 367 families are missing in AGF members but present in  
166 the other chytrid lineages.

### 167 **Genomic interactions within the rumen of mammalian herbivores**

168 We focused on three Pfam domains (“Cthe\_2159”, “Gal\_Lectin”, and “Rhamnogal\_lyase”) that  
169 are unique to the Neocallimastigomycota and previously not observed in fungal genomes.  
170 Phylogenetic analyses support a horizontal transfer of “Cthe\_2159” from rumen bacteria into  
171 AGF followed by potential gene fusion to deliver eukaryotic specific functions. Similarly,  
172 analysis of “Gal\_Lectin” domain copies in AGF suggests they were acquired from animal donor  
173 lineages. Similarity search of AGF “Rhamnogal\_lyase” domain finds most similar copies in  
174 plant genomes and phylogenetic analysis indicates the AGF polysaccharide lyase domain is  
175 distinct and not orthologous to related enzymes in other fungi.



176 A bacteria-like biomass-binding and putatively polysaccharide lyase domain (“Cthe\_2159”)  
177 The “Cthe\_2159” domain was originally characterized as a polysaccharide lyase-like protein in  
178 the thermophilic and biomass-degrading bacterium *Clostridium thermocellum* (Close et al.,  
179 2014). “Cthe\_2159” are beta-helix proteins with the ability to bind celluloses and acid-sugars  
180 (polygalacturonic acid, a major component of the pectin) and homologs are primarily found in  
181 archaeal and bacterial genomes. Notably, a total 583 copies of the “Cthe\_2159” domain were  
182 identified in 5 genomes and 21 transcriptomes of AGF taxa, but reduced to a set of 126 clusters  
183 based on overall protein similarity (>90%) due to redundancy in transcriptome assemblies. This  
184 domain is absent in all other eukaryotic genomes examined in this study (Figure 3 and Table 2).  
185 A phylogenetic tree of “Cthe\_2159” homologs identified from Archaea, Bacteria, and AGF  
186 suggest that the AGF “Cthe\_2159” domains were acquired from bacteria through HGT (Figure  
187 3). The likely donor was a gram-positive Firmicute (*Clostridiales*) (Maximum Likelihood  
188 bootstrap value 98%) and the closest protein copies of “Cthe\_2159” domains are encoded in the  
189 *Oribacterium sinus*, *Oribacterium* sp., and *Hungatella hathewayi* genomes (Figure 3). Members  
190 of the order Clostridiales are integral members of the rumen microbiome. Four of these AGF  
191 “Cthe\_2159” domain containing genes also encode eukaryotic Pfam protein domains (“Atrophin-  
192 1”, “eIF-3\_zeta”, “Nop14”, and “TPH”) at the 3’ position of the “Cthe\_2159” domain. We  
193 hypothesize these domains are the result of fusion after the acquisition of “Cthe\_2159” domain.  
194 The functions of these additional domains include initiation of the eukaryotic translation,  
195 maturation of 18S rRNA, production of 40S ribosome, and meiosis-specific activities (Figure  
196 4a). Approximately 30% of these AGF “Cthe\_2159” gene models possess between 1 and 2  
197 introns but there is limited spliced transcript evidence to provide confidence in the gene  
198 structures, so the apparent intron gains could be artifacts of genome assembly or annotation  
199 (Supplementary results) (Haitjema et al., 2017; Youssef et al., 2013).

200 An animal-like galactose binding lectin domain (“Gal\_Lectin”)

201 “Gal\_Lectin” domains were found in AGF genomes universally and absent in all other  
202 examined chytrid and fungal genomes (Table 2). Phylogenetic analysis recovered a  
203 monophyletic AGF “Gal\_Lectin” clade which was not placed as a sister clade to the animals as  
204 expected for a fungal gene. Instead, it was embedded within the animal homologs in the tree and  
205 allies with one subgroup, polycystin-1 (PC-1 protein) (Figure 5a). The three separate animal  
206 subclades contain protein members that harbor the “Gal\_Lectin” domain but with dissimilar

207 sequence information and annotated functions (Figure 5). The genomes of ruminant hosts (e.g.,  
208 horse, sheep) of the AGF fungi also encode three gene families containing the “Gal\_Lectin”  
209 domain, which can be observed in each of the animal subclades (Figure 5). The proteins in the  
210 animal subclade 1 were annotated as the PC-1, which are homologues to the human “polycystic  
211 kidney disease” (*PKDI*) genes. The members of the animal subclade 2 were searched by BLAST  
212 for the the “adhesion G-protein coupled receptor L1/3” (*ADGRL1*). The animal subclade 3  
213 contains homologs of the “EVA-1 protein”, most of which contain two adjacent copies of the  
214 “Gal\_Lectin” domain. The three subgroups of animal “Gal\_Lectin” domains are also flanked by  
215 disparate Pfam domains (Figure 5b). The gene phylogeny suggests an animal PC-1 protein as the  
216 likely donor lineage for the AGF “Gal\_Lectin” gene (Figure 5a), based on its closest sister  
217 relationship. In addition, the AGF proteins also contain a Pfam “Glyco\_transf\_34” domain  
218 (Figure 5b) which is absent in all animal homologs of the “Gal\_Lectin” containing genes  
219 suggesting its involvement in fungus specific activities in the rumen.

#### 220 A novel fungal rhamnogalacturonate lyase (“Rhamnogal\_lyase”) in AGF

221 In plants, the rhamnogalacturonate lyases are involved in the fruit ripening-related process, cell-  
222 wall modification, and lateral-root and root-hair formation (Molina-Hidalgo et al., 2013; Ponniah  
223 et al., 2017). The Pfam database classifies two types of domains for rhamnogalactoside  
224 degrading activity: “Rhamnogal\_lyase” and “RhgB\_N”. They are both N-terminal catalytic  
225 domains associated with the rhamnogalacturonan lyase protein (polysaccharide lyase family 4,  
226 PL4) and flanked persistently by the group of “fn3\_3” and “CBM-like” domains, with the  
227 particular function to degrade the rhamnogalacturonan I (RG-I) backbone of pectin. The  
228 “Rhamnogal\_lyase” domain exists in members of plants and plant-pathogenic bacteria (e.g.  
229 *Erwinia chrysanthemi*), whereas the “RhgB\_N” domain has a wider distribution and can be  
230 found in bacteria, fungi, and oomycetes (Finn et al., 2016). Sequence similarity searches using  
231 the “Rhamnogal\_lyase” domain against various protein sequence databases (e.g., Ensembl,  
232 MycoCosm, Pfam) returned no homolog in any other fungi (except the AGF members), which  
233 indicates that this domain is unique to AGF, plants, and bacteria. On the other hand, the  
234 “RhgB\_N” domain is widely shared by Dikarya fungi, Oomycetes, and bacteria. Although  
235 “RhgB\_N” and “Rhamnogal\_lyase” domains are distantly related according to the sequence  
236 similarity (24% between the copies of the *Aspergillus nidulans* and *An. robustus*), they  
237 presumably share a common origin due to that they both physically located on the N-terminal



238 region of the PL4 proteins and they have resembling functions to degrade the pectin RG-I region.  
239 The phylogenetic tree shows that although AGF “Rhamnagal\_lyase” domains are more closely  
240 related to the plant homologs than to the clades of fungi and oomycetes, these AGF  
241 rhamnogalacturonate lyases likely have evolved a specific function in fungi (Figure 3). The  
242 presence of the “Rhamnagal\_lyase” domain in the rumen-associated fungi suggests that the AGF  
243 may support an ability to soften, modify, and degrade the plant pectin within the anaerobic  
244 rumen in a related but different way from plants.

245

## 246 **Discussion**

247 Microbial diversity of ruminants is a research hotspot for development of bioenergy tools  
248 (Bryant, 1959; Marvin-Sikkema et al., 1994; Seshadri et al., 2018). The AGF fungi are an  
249 important but understudied component of the ruminant microbiome and their obligate anaerobic  
250 and relatively A-T rich genomes have limited the initial genomic resources for the group. In this  
251 study, we produced the most phylogenetically broad transcriptome sampling of the  
252 Neocallimastigomycota fungi to date to support phylogenomic and comparative analyses. Our  
253 results contribute new insights into the natural history and dynamic evolution of these cryptic  
254 ruminant gut fungi. The reconstructed phylogenomic species tree resolved previously  
255 unanswered questions about the evolutionary relationships of the members of the AGF. In  
256 addition, we provide the first estimation of the divergence time of AGF taxa, 66 ( $\pm 10$ ) Mya  
257 (Figure 1), which is in remarkable concordance with the divergence of the forage Poaceae  
258 grasses (70-95 Mya) and dietary shifts in mammalian lineages (34-66 Mya) from insectivore to  
259 herbivore and omnivore. Grass evolution enabled the herbivory transition, and this diet  
260 adaptation drove an increase in developmental and morphological complexity of the digestive  
261 tract, compartmentalization, and the development of dedicated anaerobic fermentation chambers  
262 (e.g., rumen and caecum) in the herbivorous alimentary tract to improve biomass degradation  
263 efficiency (Hackmann and Spain, 2010). This transition to plant-based (or plant-exclusive) diets  
264 required additional partnership with microbes since mammals lack cellulolytic and hemi-  
265 cellulolytic enzymes necessary to liberate sugars for absorption (Gruninger et al., 2014). In  
266 addition, the genome content comparisons help illustrate and predict new biological roles AGF  
267 play in the mammalian herbivore guts. The long branch that leads to the emergence of the

268 Neocallimastigomycota clade indicates the distinctiveness of the extant group of obligate  
269 symbiotic fungi in the mammalian herbivores and implies the existence of undiscovered although  
270 possibly extinct relatives of the Neocallimastigomycota and Chytridiomycota (Figure 1). Future  
271 environmental and metagenome sequence exploration of anaerobic environments testing for  
272 presence of these types of fungi may provide new observations that support their existence.

273 Our analyses identified multiple instances of Pfam domain gains (n=40) and losses  
274 (n=106) within the Neocallimastigomycota clade (Figure 2 and Table S1). We identified three  
275 AGF lineage specific protein domains which are absent from all other examined fungal genomes  
276 (Table 2). Phylogenetic analyses support the hypothesis that they were acquired via HGT or  
277 other noncanonical events. Phylogenetic analyses of “Cthe\_2159” and “Gal\_Lectin” indicate the  
278 domains were separately transferred from the rumen bacteria and animal hosts horizontally  
279 (Figures 3 and 5). The gains of these domains highlight how HGT has contributed to broaden the  
280 lignocellulolytic capacities (through “Cthe\_2159”) of the AGF and potentially increase their  
281 abilities for cell recognition (through “Gal\_Lectin”) within the rumen. The presence of four  
282 eukaryotic Pfam domains fused with these bacteria-originated “Cthe\_2159” genes in AGF  
283 suggests they are truly eukaryotic and encoded in the fungal genomes (Figure 4) and not a  
284 contamination artifact. Studies of intron gains and losses in fungal lineages have suggested the  
285 ancestor was intron rich, an observation that is supported by intron rich chytrid genomes (Csuros  
286 et al., 2011; Nielsen et al., 2004; Stajich et al., 2007). Although introns are present in gene  
287 models of several “Cthe\_2159” copies found in all available AGF genomes, and many are  
288 flanked with duplicated coding sequences (in *Piromyces* sp. E2), we are not able to confidently  
289 conclude these models experienced recent intron-insertion events as there is little support of  
290 spliced mRNA transcripts originating from these loci (Supplementary results).

291 The “Cthe\_2159” is a newly described protein family that bind cellulosic and pectic  
292 substrates in the anaerobic and thermophilic bacterium *Clostridium thermocellum* (Close et al.,  
293 2014). The crystal structure of the “Cthe\_2159” suggests that it is a polysaccharide lyase family  
294 with similarity with pectate lyases in the PL9 family. Similarly, “Rhamnogal\_lyase” domains are  
295 primarily function in the facilitation of cell wall modification in plants (Molina-Hidalgo et al.,  
296 2013). Phytopathogenic bacteria can utilize their prokaryotic versions of the domain to  
297 disorganize plant tissues to support the invasion (Laatu and Condemine, 2003). Although we  
298 cannot locate the original donor lineages of the AGF “Rhamnogal\_lyase” domains (Figure 6),

299 their gain is a key synapomorphy of the extant AGF taxa and may contribute to the ability of  
300 these fungi to access polysaccharides in plant cell walls. Both “Cthe\_2159” and  
301 “Rhamnogal\_lyase” (PL4 family) domains function in pectin binding or degradation activities,  
302 and the possession both suggests that AGF may have evolved abilities to deconstruct pectin with  
303 an exceptional efficiency that distinguish themselves from other fungi (Table 2 and Figure 2).  
304 Pectin is abundant in primary cell walls and the middle lamella in both dicotyledonous plants  
305 (making up 20-35% dry weight) and grasses (2-10%) serving as a protection of plant cells from  
306 degrading enzymes produced by animals (Salem et al., 2017; Vogel, 2008; Voragen et al., 2009;  
307 Xiao and Anderson, 2013). Removal of pectin can effectively increase the surface of exposed  
308 plant cell wall, and thus improve the accessibility of other polysaccharides (cellulose and  
309 hemicellulose) masked by pectin (Pakarinen et al., 2012). Both of the “Cthe\_2159” and  
310 “Rhamnogal\_lyase” proteins may have contributed to the high efficiency of the AGF biomass  
311 degradability by uncoupling the pectin that glues cells together, increasing the exposed surface  
312 areas, and thus allowing diverse polysaccharide enzymes to work on plant cells simultaneously  
313 in the rumen. These protein domains could account for the superior performance of AGF to  
314 weaken forage fibers and release polysaccharides (Borneman et al., 1989; Nagpal et al., 2009).  
315 The AGF may benefit or depend on these acquired domains in their capacity as primary  
316 degraders of ingested forage (Haitjema et al., 2014).

317 The “Gal\_Lectin” domain bears the phylogenetic hallmark of being acquired from an  
318 animal donor. Animals use galactose-binding lectins to recognize foreign entities (García-  
319 Maldonado et al., 2017) and participate in anti-microbial defenses (Low et al., 2010; Uhlenbruck  
320 and Steinhausen, 1977). Our results suggest that the “Gal\_Lectin” domains in AGF are  
321 homologous and closely related to animal PC-1 proteins (Figure 5a), which are transmembrane  
322 proteins functioning in cell recognition (Hughes et al., 1995; Weston et al., 2003). *In vitro*, PC-1  
323 shows binding ability to carbohydrate matrices and collagens type I, II, and IV (Weston et al.,  
324 2001). As such, we postulate that the acquisition of the animal-like “Gal\_Lectin” domain  
325 contributes to the AGF abilities of cell-cell recognition and interaction with other microbes in the  
326 rumen. Syntenic relationship of the coding genes shows that the AGF “Gal\_Lectin” domains are  
327 flanked by the “Glyco\_transf\_34” domain, which lacks of homologs in any other animals (Figure  
328 5b and Figure S5). The AGF-equipped “Glyco\_transf\_34” belongs to the galactosyl transferase  
329 GMA12/MNN10 family and may help catalyze the transfer of the sugar moieties in cooperating

330 with the adjacent “Gal\_Lectin” domain. Our investigation found that HGT has contributed to the  
331 AGF genome evolution with donors from both prokaryotes and eukaryotes. HGT may have  
332 helped these fungi to acquire new functions and to thrive in the anaerobic gut as a key member of  
333 the microbial community degrading plant materials in animal hosts.

334 Other than the arsenal of diverse enzyme profiles, the AGF have also been known to use  
335 rhizoids and holdfasts to physically aid the fungal body to penetrate into the plant material  
336 deeply, which is superior than other rumen microorganisms in terms of efficiency (Berlemont,  
337 2017; Gruninger et al., 2014). Our study provides evidence that the rumen fungi are able to and  
338 have actively acquire functional domains from the animal hosts and co-existing anaerobic  
339 bacteria in the rumen. These exotic genetic elements encoded in Neocallimastigomycota  
340 genomes may contribute to their distinctive function comprised of unique genomic assets  
341 comparing to their free-living relatives. The long branch leading to the recent radiation of  
342 Neocallimastigomycota (Figure 1) also suggests distinct evolutionary trajectory from the sister  
343 Chytridiomycota lineages. Living as gut-dwellers in the strict anaerobic gut environment for over  
344 66 million years, AGF have undergone reductive evolution on the mitochondria and eventually  
345 transformed it to a new organelle—hydrosome (Marvin-Sikkema et al., 1994; Youssef et al.,  
346 2013). Their ecological roles of AGF in such an extreme environment also endow their  
347 exceptional ability for plant degradation. The AGF use both physical (deconstruction of  
348 lignocelluloses) and biological (depolymerization) mechanisms before the fermentation of plant  
349 polysaccharides. These steps require diverse enzymes capable of breaking chemical bonds in  
350 carbohydrates including cellulases, hemicellulases, ligninases, and pectinases (Brandt et al.,  
351 2013). These all drive the synapomorphic and autapomorphic characters discovered in AGF.  
352 Currently few close relatives have been found and none cultured which subtend the long branch.  
353 Environmental DNA investigations of extreme environment that may be a suitable niche of those  
354 Neocallimastigomycota-like microbes may reveal potential relatives (James et al., 2000). For  
355 example, a recent metagenomic survey from costal marine sediments suggests that some  
356 operational taxonomic units (OTUs) could be assigned to Neocallimastigomycota using 28S  
357 rRNA marker (Picard, 2017). Sampling of deep sea habitats and marine mammalian herbivores  
358 could provide future discoveries of biodiversity and evolutionary importance for understanding  
359 the evolutionary trajectory of the Neocallimastigomycota.

360

## 361 **Materials and Methods**

### 362 **Transcriptome and genome datasets**

363 We generated the transcriptomes of 21 strains of Neocallimastigomycota fungi from cow, sheep,  
364 horse, and goat feces, and rumen fluid of fistulated cows in the Stillwater, OK area (Murphy et  
365 al., n.d.) (Table 1). These strains were maintained under anaerobic conditions using the modified  
366 Hungate method as described previously (Balch and Wolfe, 1976; Bryant, 1972; Hanafy et al.,  
367 2017; Hungate and Macy, 1973) . Total volume of RNA was harvested from the growing fungal  
368 strains and processed for transcriptomics sequencing, which was performed using an external  
369 commercial service provided by Novogene (Beijing, China). The RNAseq data were assembled  
370 into *de novo* transcript assemblies using Trinity (v2.6.6), followed by TransDecoder (v5.0.2) to  
371 predict ORFs (Haas et al., 2013). The generated proteomes and corresponding coding sequences  
372 were used as input to phylogenomic and comparative genomic analyses. The five published  
373 Neocallimastigomycota genome sequences were obtained from JGI MycoCosm database  
374 (Grigoriev et al., 2014; Spatafora, 2011). These are *Anaeromyces robustus* S4, *Neocallimastix*  
375 *californiae* G1, *Pecoramyces ruminantium* C1A (synonym *Orpinomyces* sp.), *Piromyces finnis*  
376 (v3.0), and *Piromyces* sp. E2 (Haitjema et al., 2017; Youssef et al., 2013). Five outgroup  
377 Chytridiomycota taxa with sequenced genomes were chosen. These are *Chytriomycetes* sp. MP 71,  
378 *Entophlyctis helioformis* JEL805, *Gaertneriomycetes semiglobifer* Barr 43, *Gonapodya prolifera*  
379 JEL478, and *Rhizoclostratium globosum* JEL800 (Chang et al., 2015; Mondo et al., 2017).  
380 Assembled transcriptomes, raw Illumina read sequences, and isolates metadata are deposited in  
381 the GenBank with the BioProject ID PRJNA489922. All accession numbers are listed in the  
382 Table 1.

### 383 **Phylogenomics and divergence time estimation**

384 A set of 434 highly conserved and generally single-copy protein coding genes in fungi and  
385 animal and plant outgroups (DOI: 10.5281/zenodo.1413687) were used for phylogenomic  
386 analyses in the PHYling pipeline (DOI: 10.5281/zenodo.1257002). Profile-Hidden-Markov-  
387 Models of these markers were searched in the chytrid predicted protein sequences using  
388 HMMER3 (v3.1b2). A total of 426 (out of 434) conserved orthologous markers were identified  
389 with hmmsearch (cutoff= $1E^{-10}$ ) in the 26 Neocallimastigomycota and 5 Chytridiomycota. The  
390 identified protein sequence homologs in each species, for each phylogenetic marker, were

391 aligned with hmmlalign to the marker profile-HMM. The protein alignments were also back  
392 translation into codon alignments guided by the protein alignment using the tool bp\_mrtrans.pl  
393 (Stajich et al., 2002). The protein and coding sequences of the markers were concatenated into a  
394 super-alignment with 426 partitions defined by each gene marker. The 426 gene partitions were  
395 further collapsed into 33 partitions by PartitionFinder v.2.1.1 with a greedy search to find  
396 partitions with consistent phylogenetic signals (Lanfear et al., 2012). Phylogenetic trees were  
397 constructed from this super-alignment and partition scheme with two methods—maximum  
398 likelihood implemented in IQ-TREE (v.1.5.5) and Bayesian inference implemented in BEAST  
399 (v.1.8.4) (Drummond and Rambaut, 2007; Nguyen et al., 2015). Configuration files for  
400 divergence time estimation analysis were coded in BEAUti v.1.8.4 using the 33 partitions and  
401 two calibration priors: 1) a direct fossil record of Chytridiomycota from the Rhynie Chert (407  
402 Mya) (Krings et al., 2016; Strullu-Derrien et al., 2016), and 2) the emergence time of  
403 Chytridiomycota (573-770 Mya as 95% HPD) from earlier studies (Chang et al., 2015; Lutzoni  
404 et al., 2018; Wang et al., n.d.). The Birth-Death incomplete sampling tree model was employed  
405 for inter-species relationships analyses (Stadler, 2009). Unlinked strict clock models were used  
406 for each partition. Archive of input files and analysis scripts used to perform the phylogenetic  
407 analyses are available at Zenodo (DOI: 10.5281/zenodo.1447226). Three independent runs were  
408 performed separately for 50 million generations each with random starting seeds. Sufficient ESS  
409 (>200) values were obtained after the default burn-in (10%) for the final sampled trees. The  
410 Maximum Clade Credibility (MCC) tree was compiled using TreeAnnotator v.1.8.4.

#### 411 **Identification of AGF-specific genes and Pfam domains**

412 Orthologous genes across the 31 genomes or transcriptomes were identified using a comparative  
413 genomic pipeline that utilized all-vs-all BLASTp (cutoff= $1E^{-5}$ ) to obtain the similarity pairs,  
414 Orthogogue to identify putative orthologous relationships, and the Markov-Clustering Algorithm  
415 (MCL using the inflation value of 1.5) to generate disjoint clusters and deployed in an analysis  
416 pipeline (DOI: 10.5281/zenodo.1447224) (Altschul et al., 1990; Ekseth et al., 2014; Van  
417 Dongen, 2000). Comparisons of shared gene content of the Orthologous clusters was performed  
418 among the Chytridiomycota lineages using a permissive strategy of counting a gene family as  
419 shared if it is missing in up to 5 of the 26 Neocallimastigomycota taxa and 1 of the 5 chytrids  
420 genomes. In this scenario, genes absent in all chytrids genomes and maintained by more than 21  
421 out of the 26 Neocallimastigomycota genomes/transcriptomes are defined as AGF unique genes;



422 on the other hand, genes missing from all Neocallimastigomycota and present in at least 4 out of  
423 the 5 chytrids genomes are treated as AGF lost genes.

424 Protein domains were identified by searching the predicted proteomes from each genome  
425 assembly or transcriptome assembly against the Protein Family (Pfam) database (v31.0, last  
426 accessed at March 20<sup>th</sup>, 2018). The enrichment heatmap of the Pfam domains across the included  
427 taxa was produced using the “aheatmap” function in the R package “NMF” based on the total  
428 copy number count in each assembly (Gaujoux and Seoighe, 2010). Genes only present in the  
429 AGF genomes and missing from all of the included free-living chytrids relatives were identified.

430 To identify genes in AGF that are likely important for interactions with mammalian hosts  
431 and plant material breakdown, we further compared the five available AGF genomes to the  
432 genomes of their animal hosts (e.g., sheep, horse, elephant, yak) (Broad Institute, 2018; Qiu et  
433 al., 2012; The International Sheep Genomics Consortium et al., 2010; Wade et al., 2009), the diet  
434 plant (e.g., moss, rice, palm, maize, sorghum) (Jiao et al., 2017; Martin et al., 2016; Paterson et  
435 al., 2009; Peng et al., 2013; Rensing et al., 2008; Singh et al., 2013; Swarbreck et al., 2008; The  
436 International Brachypodium Initiative et al., 2010; The Rice Annotation Project, 2007; Zimin et  
437 al., 2017) (Table S2), and the 1,165 available fungal genomes from the ongoing 1KFG project  
438 (Grigoriev et al., 2014; Spatafora, 2011; Spatafora et al., 2017; Stajich, 2017). To prioritize AGF  
439 genes that may have been laterally acquired from these hosts, a Python script (Wang et al., 2016)  
440 and similarity search tool BLAT (Kent, 2002) was applied to filter out genetic elements in AGF  
441 with higher similarity to animal or plant homologs than any fungal ones, excluding the AGF  
442 themselves. Candidate genes for lateral transfer were ranked by the combination of the two  
443 strategies. The candidate genes with an assigned functional or biological process annotation were  
444 analyzed with priority using phylogenetic reconstruction to infer their potential origin.

#### 445 **Identification of homologous sequences and potential origin of HGT candidate loci**

446 Three Pfam domains “Cthe\_2159”, “Gal\_Lectin”, and “Rhamnogal\_lyase” were identified to be  
447 unique to the AGF genomes as compared to the Chytridiomycota fungi or all other fungal  
448 members. To predict the donor lineages for these putative HGT events, we searched more  
449 broadly for homologues in genome databases of Plant, Metazoa, Fungi, Bacteria, and Protists in  
450 Ensembl (v37) (Zerbino et al., 2018) via the web-implemented HMMER tool  
451 (<https://www.ebi.ac.uk/Tools/hmmer/>) (cutoff=1E<sup>-3</sup>). Additional fungal homologues were found  
452 by searching the DOE JGI’s MycoCosm database (Grigoriev et al., 2014; Spatafora, 2011). The

453 profile Hidden Markov Model tool phmmer in the HMMer package (Eddy, 2011) was used to  
454 search for similar sequences in the 1,165 fungal genomes using the query of edge-trimmed  
455 domain sequences from *An. robustus* (cutoff= $1E^{-3}$ ).

456 Members of the “Rhgb\_N” sequences were obtained from the Pfam database classified in  
457 the “Rhgb\_N” (PF09284) family (Finn et al., 2016) along with the N-terminal sequences of the  
458 rhamnogalacturonate lyase families A, B, and C from GenBank (Gomez-Cortecero et al., 2015;  
459 Hacquard et al., 2016; Yoshino-Yasuda et al., 2012). A single dataset of “Rhgb\_N” and  
460 “Rhamnogal\_lyase” family members from animals, fungi, plants, and bacteria was constructed  
461 from these searches. Domain names were confirmed using NCBI’s conserved domain search tool  
462 (cutoff= $1E^{-5}$ ) with unaligned FASTA sequences (Marchler-Bauer et al., 2017). Similarly,  
463 homologs of the “Gal\_Lectin” and “Cthe\_2159” were obtained by searching for similar  
464 sequences in the previously described genome databases and the categorized Pfam database  
465 (families of “Gal\_Lectin (PF02140)” and “Cthe\_2159 (PF14262)”). Homologous sequences  
466 containing the “Cthe\_2159” domain were only identified in Archaea and Bacteria, while the  
467 AGF copies are the first eukaryotic representatives identified with this domain. Homologs of the  
468 flanking domain “Glyco\_transf\_34” was obtained similarly from EnsEMBL genome databases  
469 described above using the edge-trimmed domain sequence from *An. robustus* (cutoff= $1E^{-5}$ ).  
470 Highly similar sequences (>90%) were filtered using CD-HIT v4.6.4 followed by multiple  
471 sequence alignment with MUSCLE v3.8.31 (Edgar, 2004; Fu et al., 2012).

#### 472 **Phylogenetic trees of the HGT candidates**

473 In total, 747 sequences of the rhamnogalacturanate degradation proteins (including both  
474 “Rhamnogal\_lyase” and “Rhgb\_N”) were included in the alignment. For the other two domains,  
475 “Gal\_Lectin” and “Cthe\_2159”, the alignments include 297 and 234 unique variants  
476 respectively. The “Cthe\_2159” domain containing genes in the 5 AGF genomes were aligned  
477 separately using MUSCLE v3.8.31 in Mesquite software (Edgar, 2004; Maddison and Maddison,  
478 2007). Both the upstream and downstream flanking regions of the studied Pfam domain  
479 sequences were trimmed using the Mesquite software (Maddison and Maddison, 2007).  
480 Selection of the appropriate substitutional model, the maximum-likelihood phylogenetic tree  
481 reconstruction, and the ultrafast bootstrapping (1000 replicates) were conducted using the IQ-  
482 TREE v1.5.5 package (Hoang et al., 2017; Kalyaanamoorthy et al., 2017; Nguyen et al., 2015).

## 483 **Acknowledgements**

484 This work was supported by National Science Foundation Grants (DEB-1557110 to J.E.S. and  
485 DEB-1557102 to N.Y. and M.E.). Y.W. acknowledges the Mycological Society of America for  
486 the Translational Mycology Postdoctoral Award. Data analyses were performed on the  
487 University of California Riverside High-Performance Computational Cluster supported by NSF  
488 DBI-1429826 and NIH S10-OD016290.

## 489 **References**

- 490 Altschul SF, Gish W, Miller W, Myers EW, Lipman DJ. 1990. Basic local alignment search tool.  
491 *J Mol Biol* **215**:403–410. doi:10.1016/S0022-2836(05)80360-2
- 492 Balch WE, Wolfe RS. 1976. New approach to the cultivation of methanogenic bacteria: 2-  
493 mercaptoethanesulfonic acid (HS-CoM)-dependent growth of *Methanobacterium*  
494 *ruminantium* in a pressurized atmosphere. *Appl Environ Microbiol* **32**:781–791.
- 495 Berlemont R. 2017. Distribution and diversity of enzymes for polysaccharide degradation in  
496 fungi. *Sci Rep* **7**:1–11. doi:10.1038/s41598-017-00258-w
- 497 Borneman WS, Akin DE, Ljungdahl LG. 1989. Fermentation products and plant cell wall-  
498 degrading enzymes produced by monocentric and polycentric anaerobic ruminal fungi. *Appl*  
499 *Environ Microbiol* **55**:1066–1073.
- 500 Brandt A, Gräsvik J, Hallett JP, Welton T. 2013. Deconstruction of lignocellulosic biomass with  
501 ionic liquids. *Green Chem* **15**:550–583. doi:10.1039/c2gc36364j
- 502 Bremer K. 2002. Gondwanan evolution of the grass alliance of families (Poales). *Evolution (N Y)*  
503 **56**:1374–1387. doi:10.1111/j.0014-3820.2002.tb01451.x
- 504 Broad Institute. 2018. Elephant Genome Project. [http://www.broadinstitute.org/scientific-  
505 community/science/projects/mammals-models/elephant/elephant-genome-project](http://www.broadinstitute.org/scientific-community/science/projects/mammals-models/elephant/elephant-genome-project)
- 506 Bryant MP. 1972. Commentary of anaerobic on the Hungate technique for culture. *Am J Clin*  
507 *Nutr.*
- 508 Bryant MP. 1959. Bacterial species of the rumen. *Bact Rev* **23**:125–153.
- 509 Chaib De Mares M, Hess J, Floudas D, Lipzen A, Choi C, Kennedy M, Grigoriev I V., Pringle  
510 A. 2014. Horizontal transfer of carbohydrate metabolism genes into ectomycorrhizal  
511 *Amanita*. *New Phytol* **205**:1552–1564. doi:10.1111/nph.13140
- 512 Chang Y, Wang S, Sekimoto S, Aerts A, Choi C, Clum A, LaButti K, Lindquist E, Ngan CY,  
513 Ohm RA, Salamov A, Grigoriev I V., Spatafora JW, Berbee M. 2015. Phylogenomic  
514 analyses indicate that early fungi evolved digesting cell walls of algal ancestors of land  
515 plants. *Genome Biol Evol* **7**:1590–1601. doi:10.1093/gbe/evv090

- 516 Christin PA, Spriggs E, Osborne CP, Strömberg CAE, Salamin N, Edwards EJ. 2014. Molecular  
517 dating, evolutionary rates, and the age of the grasses. *Syst Biol* **63**:153–165.  
518 doi:10.1093/sysbio/syt072
- 519 Close DW, D'angelo S, Bradbury ARM. 2014. A new family of  $\beta$ -helix proteins with similarities  
520 to the polysaccharide lyases. *Acta Crystallogr Sect D Biol Crystallogr* **70**:2583–2592.  
521 doi:10.1107/S1399004714015934
- 522 Csuros M, Rogozin IB, Koonin E V. 2011. A detailed history of intron-rich eukaryotic ancestors  
523 inferred from a global survey of 100 complete genomes. *PLoS Comput Biol* **7**:1–9.  
524 doi:10.1371/journal.pcbi.1002150
- 525 Dhillon B, Feau N, Aerts AL, Beauseigle S, Bernier L, Copeland A, Foster A, Gill N, Henrissat  
526 B, Herath P, LaButti KM, Levasseur A, Lindquist EA, Majoor E, Ohm RA, Pangilinan JL,  
527 Pribowo A, Saddler JN, Sakalidis ML, de Vries RP, Grigoriev I V., Goodwin SB, Tanguay  
528 P, Hamelin RC. 2015. Horizontal gene transfer and gene dosage drives adaptation to wood  
529 colonization in a tree pathogen. *Proc Natl Acad Sci* **112**:3451–3456.  
530 doi:10.1073/pnas.1424293112
- 531 Drummond AJ, Rambaut A. 2007. BEAST: Bayesian evolutionary analysis by sampling trees.  
532 *BMC Evol Biol* **7**:214. doi:10.1186/1471-2148-7-214
- 533 Eddy SR. 2011. Accelerated profile HMM searches. *PLoS Comput Biol* **7**:e1002195.  
534 doi:10.1371/journal.pcbi.1002195
- 535 Edgar RC. 2004. MUSCLE: multiple sequence alignment with high accuracy and high  
536 throughput. *Nucleic Acids Res* **32**:1792–1797. doi:10.1093/nar/gkh340
- 537 Ekseth OK, Kuiper M, Mironov V. 2014. OrthAgogue: an agile tool for the rapid prediction of  
538 orthology relations. *Bioinformatics* **30**:734–736. doi:10.1093/bioinformatics/btt582
- 539 Emerling CA, Delsuc F, Nachman MW. 2018. Chitinase genes ( CHIAs) provide genomic  
540 footprints of a post-Cretaceous dietary radiation in placental mammals. *Sci Adv* **4**:eaar6478.  
541 doi:10.1126/sciadv.aar6478
- 542 Finn RD, Coggill P, Eberhardt RY, Eddy SR, Mistry J, Mitchell AL, Potter SC, Punta M,  
543 Qureshi M, Sangrador-Vegas A, Salazar GA, Tate J, Bateman A. 2016. The Pfam protein  
544 families database: towards a more sustainable future. *Nucleic Acids Res* **44**:D279–D285.  
545 doi:10.1093/nar/gkv1344
- 546 Fu L, Niu B, Zhu Z, Wu S, Li W. 2012. CD-HIT: accelerated for clustering the next-generation  
547 sequencing data. *Bioinformatics* **28**:3150–3152. doi:10.1093/bioinformatics/bts565
- 548 García-Maldonado E, Cano-Sanchez P, Hernandez-Santoyo A. 2017. Molecular and functional  
549 characterization of a glycosylated galactose-binding lectin from *Mytilus californianus*. *Fish*  
550 *Shellfish Immunol* **66**:564–574. doi:10.1016/j.fsi.2017.05.057
- 551 Gardiner DM, McDonald MC, Covarelli L, Solomon PS, Rusu AG, Marshall M, Kazan K,

- 552 Chakraborty S, McDonald BA, Manners JM. 2012. Comparative pathogenomics reveals  
553 horizontally acquired novel virulence genes in fungi infecting cereal hosts. *PLoS Pathog* **8**.  
554 doi:10.1371/journal.ppat.1002952
- 555 Gaujoux R, Seoighe C. 2010. A flexible R package for nonnegative matrix factorization. *BMC*  
556 *Bioinformatics* **11**:367. doi:10.1186/1471-2105-11-367
- 557 Gaut BS. 2002. Evolutionary dynamics of grass genomes. *New Phytol* **154**:15–28.  
558 doi:10.1046/j.1469-8137.2002.00352.x
- 559 Gomez-Cortecero A, Harrison RJ, Armitage AD. 2015. Draft genome sequence of a European  
560 isolate of the apple canker pathogen *Neonectria ditissima*. *Genome Announc* **3**:10–11.  
561 doi:10.1128/genomeA.01243-15
- 562 Grigoriev I V., Nikitin R, Haridas S, Kuo A, Ohm R, Otilar R, Riley R, Salamov A, Zhao X,  
563 Korzeniewski F, Smirnova T, Nordberg H, Dubchak I, Shabalov I. 2014. MycoCosm portal:  
564 gearing up for 1000 fungal genomes. *Nucleic Acids Res* **42**:D699–D704.  
565 doi:10.1093/nar/gkt1183
- 566 Gruninger RJ, Puniya AK, Callaghan TM, Edwards JE, Youssef N, Dagar SS, Fliegerova K,  
567 Griffith GW, Forster R, Tsang A, Mcallister T, Elshahed MS. 2014. Anaerobic fungi  
568 (phylum Neocallimastigomycota): Advances in understanding their taxonomy, life cycle,  
569 ecology, role and biotechnological potential. *FEMS Microbiol Ecol* **90**:1–17.  
570 doi:10.1111/1574-6941.12383
- 571 Haas BJ, Papanicolaou A, Yassour M, Grabherr M, Blood PD, Bowden J, Couger MB, Eccles D,  
572 Li B, Lieber M, Macmanes MD, Ott M, Orvis J, Pochet N, Strozzi F, Weeks N, Westerman  
573 R, William T, Dewey CN, Henschel R, Leduc RD, Friedman N, Regev A. 2013. *De novo*  
574 transcript sequence reconstruction from RNA-seq using the Trinity platform for reference  
575 generation and analysis. *Nat Protoc* **8**:1494–1512. doi:10.1038/nprot.2013.084
- 576 Hackmann TJ, Spain JN. 2010. Ruminant ecology and evolution: perspectives useful to ruminant  
577 livestock research and production. *J Dairy Sci* **93**:1320–1334. doi:10.3168/jds.2009-2071
- 578 Hacquard S, Kracher B, Hiruma K, Münch PC, Garrido-Oter R, Thon MR, Weimann A, Damm  
579 U, Dallery JF, Hainaut M, Henrissat B, Lespinet O, Sacristán S, Ver Loren Van Themaat E,  
580 Kemen E, McHardy AC, Schulze-Lefert P, O’Connell RJ. 2016. Survival trade-offs in plant  
581 roots during colonization by closely related beneficial and pathogenic fungi. *Nat Commun*  
582 **7**:11362. doi:10.1038/ncomms11362
- 583 Haitjema CH, Gilmore SP, Henske JK, Solomon K V, De Groot R, Kuo A, Mondo S, Salamov  
584 AA, LaButti K, Zhao Z, Chiniquy J, Barry KW, Brewer HM, Purvine SO, Wright AT,  
585 Hainaut M, Boxma B, Van Alen T, Hackstein JHP, Henrissat B, Baker SE, Grigoriev I V,  
586 O’Malley MA. 2017. A parts list for fungal cellulosomes revealed by comparative  
587 genomics. *Nat Microbiol* **2**:1–8. doi:10.1038/nmicrobiol.2017.87
- 588 Haitjema CH, Solomon K V., Henske JK, Theodorou MK, O’Malley MA. 2014. Anaerobic gut  
589 fungi: advances in isolation, culture, and cellulolytic enzyme discovery for biofuel



- 590 production. *Biotechnol Bioeng* **111**:1471–1482. doi:10.1002/bit.25264
- 591 Hanafy RA, Elshahed MS, Liggenstoffer AS, Griffith GW, Youssef NH. 2017. *Pecoramyces*  
592 ruminantium, gen. nov., sp. nov., an anaerobic gut fungus from the feces of cattle and sheep.  
593 *Mycologia* **5514**:37–41. doi:10.1080/07474938.2014.956624
- 594 Hoang DT, Chernomor O, von Haeseler A, Minh BQ, Le SV. 2017. UFBoot2: improving the  
595 ultrafast bootstrap approximation. *Mol Biol Evol* **35**:518–522. doi:10.1093/molbev/msx281
- 596 Hughes J, Ward C, Peral B, Aspinwall R, Clark K, San Millán J, Gamble V, Harris P. 1995. The  
597 polycystic kidney disease 1 (PKD1) gene encodes a novel protein with multiple cell  
598 recognition domains. *Nat Genet* **10**:151–160. doi:10.1038/ng0695-151
- 599 Hungate RE, Macy J. 1973. The roll-tube method for cultivation of strict anaerobes. *Bull from*  
600 *Ecol Res Comm* **17**:123–126.
- 601 James TY, Kauff F, Schoch CL, Matheny PB, Hofstetter V, Cox CJ, Celio G, Gueidan C, Fraker  
602 E, Miadlikowska J, Lumbsch HT, Rauhut A, Reeb V, Arnold AE, Amtoft A, Stajich JE,  
603 Hosaka K, Sung G-H, Johnson D, O'Rourke B, Crockett M, Binder M, Curtis JM, Slot JC,  
604 Wang Z, Wilson AW, Schüssler A, Longcore JE, O'Donnell K, Mozley-Standridge S,  
605 Porter D, Letcher PM, Powell MJ, Taylor JW, White MM, Griffith GW, Davies DR,  
606 Humber RA, Morton JB, Sugiyama J, Rossman AY, Rogers JD, Pfister DH, Hewitt D,  
607 Hansen K, Hambleton S, Shoemaker RA, Kohlmeyer J, Volkmann-Kohlmeyer B, Spotts  
608 RA, Serdani M, Crous PW, Hughes KW, Matsuura K, Langer E, Langer G, Untereiner WA,  
609 Lücking R, Büdel B, Geiser DM, Aptroot A, Diederich P, Schmitt I, Schultz M, Yahr R,  
610 Hibbett DS, Lutzoni F, McLaughlin DJ, Spatafora JW, Vilgalys R. 2006a. Reconstructing  
611 the early evolution of Fungi using a six-gene phylogeny. *Nature* **443**:818–822.  
612 doi:10.1038/nature05110
- 613 James TY, Letcher PM, Longcore JE, Mozley-Standridge SE, Porter D, Powell MJ, Griffith GW,  
614 Vilgalys R. 2006b. A molecular phylogeny of the flagellated fungi (Chytridiomycota) and  
615 description of a new phylum (Blastocladiomycota). *Mycologia* **98**:860–871.  
616 doi:10.3852/mycologia.98.6.860
- 617 James TY, Porter D, Leander C a., Vilgalys R, Longcore JE. 2000. Molecular phylogenetics of  
618 the Chytridiomycota supports the utility of ultrastructural data in chytrid systematics. *Can J*  
619 *Bot* **78**:336–350. doi:10.1139/cjb-78-3-336
- 620 Jiao Y, Peluso P, Shi J, Liang T, Stitzer MC, Wang B, Campbell MS, Stein JC, Wei X, Chin CS,  
621 Guill K, Regulski M, Kumari S, Olson A, Gent J, Schneider KL, Wolfgruber TK, May MR,  
622 Springer NM, Antoniou E, McCombie WR, Presting GG, McMullen M, Ross-Ibarra J,  
623 Dawe RK, Hastie A, Rank DR, Ware D. 2017. Improved maize reference genome with  
624 single-molecule technologies. *Nature* **546**:524–527. doi:10.1038/nature22971
- 625 Kalyaanamoorthy S, Minh BQ, Wong TKF, Von Haeseler A, Jermiin LS. 2017. ModelFinder:  
626 fast model selection for accurate phylogenetic estimates. *Nat Methods* **14**:587–589.  
627 doi:10.1038/nmeth.4285



- 628 Kent WJ. 2002. BLAT—the BLAST-like alignment tool. *Genome Res* **12**:656–664.  
629 doi:10.1101/gr.229202.
- 630 Krings M, Taylor TN, Martin H. 2016. An enigmatic fossil fungus from the 410 Ma Rhynie chert  
631 that resembles *Macrochytrium* (Chytridiomycota) and *Blastocladiella*  
632 (*Blastocladiomycota*). *Mycologia* **108**:303–312. doi:10.3852/15-224
- 633 Laatu M, Condemine G. 2003. Rhamnogalacturonate lyase rhiE is secreted by the out system in  
634 *Erwinia chrysanthemi*. *J Bacteriol* **185**:1642–1649. doi:10.1128/JB.185.5.1642-1649.2003
- 635 Lanfear R, Calcott B, Ho SYW, Guindon S. 2012. PartitionFinder: combined selection of  
636 partitioning schemes and substitution models for phylogenetic analyses. *Mol Biol Evol*  
637 **29**:1695–1701. doi:10.1093/molbev/mss020
- 638 Liggenstoffer AS, Youssef NH, Couger MB, Elshahed MS. 2010. Phylogenetic diversity and  
639 community structure of anaerobic gut fungi (phylum Neocallimastigomycota) in ruminant  
640 and non-ruminant herbivores. *ISME J* **4**:1225–1235. doi:10.1038/ismej.2010.49
- 641 Low DHP, Frecer V, Le Saux A, Srinivasan GA, Ho B, Chen J, Ding JL. 2010. Molecular  
642 interfaces of the galactose-binding protein tectonin domains in host-pathogen interaction. *J*  
643 *Biol Chem* **285**:9898–9907. doi:10.1074/jbc.M109.059774
- 644 Lutzoni F, Nowak MD, Alfaro ME, Reeb V, Miadlikowska J, Krug M, Arnold AE, Lewis LA,  
645 Swofford D, Hibbett D, Hilu K, James TY, Quandt D, Magallón S. 2018. Contemporaneous  
646 radiations of fungi and plants linked to symbiosis. *Nat Commun* **9**:1–11.  
647 doi:10.1038/s41467-018-07849-9
- 648 Maddison W, Maddison D. 2007. Mesquite: a modular system for evolutionary analysis Version  
649 2.75.
- 650 Marchler-Bauer A, Bo Y, Han L, He J, Lanczycki CJ, Lu S, Chitsaz F, Derbyshire MK, Geer  
651 RC, Gonzales NR, Gwadz M, Hurwitz DI, Lu F, Marchler GH, Song JS, Thanki N, Wang  
652 Z, Yamashita RA, Zhang D, Zheng C, Geer LY, Bryant SH. 2017. CDD/SPARCLE:  
653 functional classification of proteins via subfamily domain architectures. *Nucleic Acids Res*  
654 **45**:D200–D203. doi:10.1093/nar/gkw1129
- 655 Martin G, Baurens FC, Droc G, Rouard M, Cenci A, Kilian A, Hastie A, Doležel J, Aury JM,  
656 Alberti A, Carreel F, D’Hont A. 2016. Improvement of the banana “*Musa acuminata*”  
657 reference sequence using NGS data and semi-automated bioinformatics methods. *BMC*  
658 *Genomics* **17**:1–12. doi:10.1186/s12864-016-2579-4
- 659 Marvin-Sikkema FD, Driessen AJM, Gottschal JC, Prins RA. 1994. Metabolic energy generation  
660 in hydrogenosomes of the anaerobic fungus *Neocallimastix*: evidence for a functional  
661 relationship with mitochondria. *Mycol Res* **98**:205–212. doi:10.1016/S0953-  
662 7562(09)80187-1
- 663 Molina-Hidalgo FJ, Franco AR, Villatoro C, Medina-Puche L, Mercado JA, Hidalgo MA,  
664 Monfort A, Caballero JL, Muñoz-Blanco J, Blanco-Portales R. 2013. The strawberry

- 665 (*Fragaria*×*ananassa*) fruit-specific *rhamnogalacturonate lyase 1 (FaRGLyase1)* gene  
666 encodes an enzyme involved in the degradation of cell-wall middle lamellae. *J Exp Bot*  
667 **64**:1471–1483. doi:10.1093/jxb/ers386
- 668 Mondo SJ, Dannebaum RO, Kuo RC, Louie KB, Bewick AJ, LaButti K, Haridas S, Kuo A,  
669 Salamov A, Ahrendt SR, Lau R, Bowen BP, Lipzen A, Sullivan W, Andreopoulos BB,  
670 Clum A, Lindquist E, Daum C, Northen TR, Kunde-Ramamoorthy G, Schmitz RJ,  
671 Gryganskyi A, Culley D, Magnuson J, James TY, O'Malley MA, Stajich JE, Spatafora JW,  
672 Visel A, Grigoriev I V. 2017. Widespread adenine N6-methylation of active genes in fungi.  
673 *Nat Genet* **49**:964–968. doi:10.1038/ng.3859
- 674 Murphy CM, Youssef NH, Hanafy RA, Couger MB, Jason E, Wang Y, Baker K, Dagar SS,  
675 Griffith GW, Ibrahim F, Callaghan TM, Elshahed MS. n.d. Horizontal gene transfer forged  
676 the evolution of anaerobic gut fungi into a phylogenetically distinct gut-dwelling fungal  
677 lineage. *Revis*.
- 678 Nagpal R, Puniya AK, Griffith GW, Goel G, Puniya M, Sehgal JP, Singh K. 2009. Anaerobic  
679 rumen fungi: potential and applications In: Khachatourians GG, Arora DK, Rajendran TP,  
680 Srivastava AK, editors. Agriculturally Important Microorganisms. Academic World  
681 International. pp. 375–393.
- 682 Nguyen LT, Schmidt HA, Von Haeseler A, Minh BQ. 2015. IQ-TREE: a fast and effective  
683 stochastic algorithm for estimating maximum-likelihood phylogenies. *Mol Biol Evol*  
684 **32**:268–274. doi:10.1093/molbev/msu300
- 685 Nielsen CB, Friedman B, Birren B, Burge CB, Galagan JE. 2004. Patterns of intron gain and loss  
686 in fungi. *PLoS Biol* **2**. doi:10.1371/journal.pbio.0020422
- 687 Pakarinen A, Zhang J, Brock T, Maijala P, Viikari L. 2012. Enzymatic accessibility of fiber  
688 hemp is enhanced by enzymatic or chemical removal of pectin. *Bioresour Technol*  
689 **107**:275–281. doi:10.1016/j.biortech.2011.12.101
- 690 Paterson AH, Bowers JE, Bruggmann R, Dubchak I, Grimwood J, Gundlach H, Haberer G,  
691 Hellsten U, Mitros T, Poliakov A, Schmutz J, Spannagl M, Tang H, Wang X, Wicker T,  
692 Bharti AK, Chapman J, Feltus FA, Gowik U, Grigoriev I V., Lyons E, Maher CA, Martis  
693 M, Narechania A, Otillar RP, Penning BW, Salamov AA, Wang Y, Zhang L, Carpita NC,  
694 Freeling M, Gingle AR, Hash CT, Keller B, Klein P, Kresovich S, McCann MC, Ming R,  
695 Peterson DG, Mehboob-Ur-Rahman, Ware D, Westhoff P, Mayer KFX, Messing J, Rokhsar  
696 DS. 2009. The *Sorghum bicolor* genome and the diversification of grasses. *Nature* **457**:551–  
697 556. doi:10.1038/nature07723
- 698 Peng Z, Lu Y, Li L, Zhao Q, Feng Q, Gao Z, Lu H, Hu T, Yao N, Liu K, Li Y, Fan D, Guo Y, Li  
699 W, Lu Y, Weng Q, Zhou C, Zhang L, Huang T, Zhao Y, Zhu C, Liu X, Yang X, Wang T,  
700 Miao K, Zhuang C, Cao X, Tang W, Liu G, Liu Y, Chen J, Liu Z, Yuan L, Liu Z, Huang X,  
701 Lu T, Fei B, Ning Z, Han B, Jiang Z. 2013. The draft genome of the fast-growing non-  
702 timber forest species moso bamboo (*Phyllostachys heterocycla*). *Nat Genet* **45**:456–461.  
703 doi:10.1038/ng.2569

- 704 Picard KT. 2017. Coastal marine habitats harbor novel early-diverging fungal diversity. *Fungal*  
705 *Ecol* **25**:1–13. doi:10.1016/j.funeco.2016.10.006
- 706 Pombert J-F, Selman M, Burki F, Bardell FT, Farinelli L, Solter LF, Whitman DW, Weiss LM,  
707 Corradi N, Keeling PJ. 2012. Gain and loss of multiple functionally related, horizontally  
708 transferred genes in the reduced genomes of two microsporidian parasites. *Proc Natl Acad*  
709 *Sci* **109**:12638–12643. doi:10.1073/pnas.1205020109
- 710 Ponniah SK, Thimmapuram J, Bhide K, Kalavacharla VK, Manoharan M. 2017. Comparative  
711 analysis of the root transcriptomes of cultivated sweetpotato (*Ipomoea batatas* [L.] Lam)  
712 and its wild ancestor (*Ipomoea trifida* [Kunth] G. Don). *BMC Plant Biol* **17**:1–14.  
713 doi:10.1186/s12870-016-0950-x
- 714 Prasad V, Strömberg CAE, Alimohammadian H, Sahni A. 2005. Dinosaur coprolites and the  
715 early evolution of grasses and grazers. *Science* **310**:1177–1180.  
716 doi:10.1126/science.1118806
- 717 Qiu Q, Zhang G, Ma T, Qian W, Ye Z, Cao C, Hu Q, Kim J, Larkin DM, Auvil L, Capitanu B,  
718 Ma J, Lewin HA, Qian X, Lang Y, Zhou R, Wang L, Wang K, Xia J, Liao S, Pan S, Lu X,  
719 Hou H, Wang Y, Zang X, Yin Y, Ma H, Zhang J, Wang Z, Zhang Y, Zhang D, Yonezawa  
720 T, Hasegawa M, Zhong Y, Liu W, Zhang Y, Huang Z, Zhang S, Long R, Yang H, Lenstra  
721 JA, Cooper DN, Wu Y, Wang J, Shi P, Wang J, Liu J, Wang J. 2012. The yak genome and  
722 adaptation to life at high altitude. *Nat Genet* **44**:946–949. doi:10.1038/ng.2343
- 723 Rensing SA, Lang D, Zimmer AD, Terry A, Salamov A, Shapiro H, Nishiyama T, Perroud P-F,  
724 Lindquist EA, Kamisugi Y, Tanahashi T, Sakakibara K, Fujita T, Oishi K, Shin-I T, Kuroki  
725 Y, Toyoda A, Suzuki Y, Hashimoto S, Yamaguchi K, Sugano S, Kohara Y, Fujiyama A,  
726 Anterola A, Aoki S, Ashton N, Barbazuk WB, Barker E, Bennetzen JL, Blankenship R, Cho  
727 SH, Dutcher SK, Estelle M, Fawcett JA, Gundlach H, Hanada K, Heyl A, Hicks KA,  
728 Hughes J, Lohr M, Mayer K, Melkozernov A, Murata T, Nelson DR, Pils B, Prigge M,  
729 Reiss B, Renner T, Rombauts S, Rushton PJ, Sanderfoot A, Schween G, Shiu S-H, Stueber  
730 K, Theodoulou FL, Tu H, Van de Peer Y, Verrier PJ, Waters E, Wood A, Yang L, Cove D,  
731 Cuming AC, Hasebe M, Lucas S, Mishler BD, Reski R, Grigoriev I V, Quatrano RS, Boore  
732 JL. 2008. The Physcomitrella genome reveals evolutionary insights into the conquest of  
733 land by plants. *Science* **319**:64–69. doi:10.1126/science.1150646
- 734 Richards TA, Soanes DM, Foster PG, Leonard G, Thornton CR, Talbot NJ. 2009. Phylogenomic  
735 analysis demonstrates a pattern of rare and ancient horizontal gene transfer between plants  
736 and fungi. *Plant Cell* **21**:1897–1911. doi:10.1105/tpc.109.065805
- 737 Salem H, Bauer E, Kirsch R, Vogel H, Fukatsu T, Kaltenpoth M, Salem H, Bauer E, Kirsch R,  
738 Berasategui A, Cripps M, Weiss B, Koga R, Fukumori K, Vogel H, Fukatsu T, Kaltenpoth  
739 M. 2017. Drastic genome reduction in an herbivore’s pectinolytic symbiont. *Cell* **171**:1520–  
740 1525. doi:10.1016/j.cell.2017.10.029
- 741 Seshadri R, Leahy SC, Attwood GT, Teh KH, Lambie SC, Cookson AL, Eloefadrosch EA,  
742 Pavlopoulos GA, Hadjithomas M, Varghese NJ, Paez-espino D, Perry R, Henderson G,  
743 Creevey CJ, Terrapon N, Lapebie P, Drula E, Lombard V, Rubin E, Kyrpidis NC, Henrissat

- 744 B, Woyke T, Ivanova NN, Kelly WJ. 2018. Cultivation and sequencing of rumen  
745 microbiome members from the Hungate1000 Collection. *Nat Biotechnol* **36**:359–367.  
746 doi:10.1038/nbt.4110
- 747 Singh R, Ong-Abdullah M, Low ETL, Manaf MAA, Rosli R, Nookiah R, Ooi LCL, Ooi SE,  
748 Chan KL, Halim MA, Azizi N, Nagappan J, Bacher B, Lakey N, Smith SW, He D, Hogan  
749 M, Budiman MA, Lee EK, Desalle R, Kudrna D, Goicoechea JL, Wing RA, Wilson RK,  
750 Fulton RS, Ordway JM, Martienssen RA, Sambanthamurthi R. 2013. Oil palm genome  
751 sequence reveals divergence of interfertile species in Old and New worlds. *Nature* **500**:335–  
752 339. doi:10.1038/nature12309
- 753 Solomon K V., Haitjema CH, Henske JK, Gilmore SP, Borges-Rivera D, Lipzen A, Brewer HM,  
754 Purvine SO, Wright AT, Theodorou MK, Grigoriev I V., Regev A, Thompson DA,  
755 OMalley MA. 2016. Early-branching gut fungi possess a large, comprehensive array of  
756 biomass-degrading enzymes. *Science (80- )* **351**:1192–1195. doi:10.1126/science.aad1431
- 757 Spatafora JW. 2011. 1000 fungal genomes to be sequenced. *IMA Fungus* **2**:41.
- 758 Spatafora JW, Aime MC, Grigoriev I V, Martin F, Stajich JE, Blackwell M. 2017. The fungal  
759 tree of life: from molecular systematics to genome-scale phylogenies. *Microbiol Spectr* **5**:3–  
760 34. doi:10.1128/microbiolspec.FUNK-0053-2016
- 761 Stadler T. 2009. On incomplete sampling under birth–death models and connections to the  
762 sampling-based coalescent. *J Theor Biol* **261**:58–66. doi:10.1016/j.jtbi.2009.07.018
- 763 Stajich JE. 2017. Fungal genomes and insights into the evolution of the Kingdom. *Microbiol*  
764 *Spectr* **5**:1–15. doi:10.1128/microbiolspec.FUNK-0055-2016
- 765 Stajich JE, Block D, Boulez K, Steven E. Brenner, Chervitz SA, Chris Dagdigian, Fuellen G,  
766 Gilbert JGR, Korf I, Lapp H, Lehvaslaiho H, Matsalla C, Mungall CJ, Osborne BI, Pocock  
767 MR, Schattner P, Senger M, Stein LD, Stupka E, Wilkinson MD, Birney E. 2002. The  
768 Bioperl toolkit: Perl modules for the life sciences. *Genome Res* **12**:1611–1618.  
769 doi:10.1101/gr.361602.the
- 770 Stajich JE, Dietrich FS, Roy SW. 2007. Comparative genomic analysis of fungal genomes  
771 reveals intron-rich ancestors. *Genome Biol* **8**. doi:10.1186/gb-2007-8-10-r223
- 772 Stewart RD, Auffret MD, Warr A, Wisner AH, Press MO, Langford KW, Liachko I, Snelling TJ,  
773 Dewhurst RJ, Walker AW, Roehe R, Watson M. 2018. metagenomic sequencing of the cow  
774 rumen. *Nat Commun* **9**:870. doi:10.1038/s41467-018-03317-6
- 775 Strullu-Derrien C, Goral T, Longcore JE, Olesen J, Kenrick P, Edgecombe GD. 2016. A new  
776 chytridiomycete fungus intermixed with crustacean resting eggs in a 407-million-year-old  
777 continental freshwater environment. *PLoS One* **11**:1–14. doi:10.1371/journal.pone.0167301
- 778 Sun G, Yang Z, Kosch T, Summers K, Huang J. 2011. Evidence for acquisition of virulence  
779 effectors in pathogenic chytrids. *BMC Evol Biol* **11**. doi:10.1186/1471-2148-11-195

- 780 Swarbreck D, Wilks C, Lamesch P, Berardini TZ, Garcia-Hernandez M, Foerster H, Li D, Meyer  
781 T, Muller R, Ploetz L, Radenbaugh A, Singh S, Swing V, Tissier C, Zhang P, Huala E.  
782 2008. The Arabidopsis Information Resource (TAIR): gene structure and function  
783 annotation. *Nucleic Acids Res* **36**:D1009–D1014. doi:10.1093/nar/gkm965
- 784 The International Brachypodium Initiative, Vogel JP, Garvin DF, Mockler TC, Schmutz J,  
785 Rokhsar D, Bevan MW, Barry K, Lucas S, Harmon-Smith M, Lail K, Tice H, Grimwood J,  
786 McKenzie N, Huo N, Gu YQ, Lazo GR, Anderson OD, You FM, Luo MC, Dvorak J,  
787 Wright J, Febrer M, Idziak D, Hasterok R, Lindquist E, Wang M, Fox SE, Priest HD,  
788 Filichkin SA, Givan SA, Bryant DW, Chang JH, Wu H, Wu W, Hsia AP, Schnable PS,  
789 Kalyanaraman A, Barbazuk B, Michael TP, Hazen SP, Bragg JN, Laudencia-Chingcuanco  
790 D, Weng Y, Haberer G, Spannagl M, Mayer K, Rattei T, Mitros T, Lee SJ, Rose JKC,  
791 Mueller LA, York TL, Wicker T, Buchmann JP, Tanskanen J, Schulman AH, Gundlach H,  
792 Beven M, Costa De Oliveira A, Da C. Maia L, Belknap W, Jiang N, Lai J, Zhu L, Ma J, Sun  
793 C, Pritham E, Salse J, Murat F, Abrouk M, Bruggmann R, Messing J, Fahlgren N, Sullivan  
794 CM, Carrington JC, Chapman EJ, May GD, Zhai J, Ganssmann M, Gurazada SGR, German  
795 M, Meyers BC, Green PJ, Tyler L, Wu J, Thomson J, Chen S, Scheller H V., Harholt J,  
796 Ulvskov P, Kimbrel JA, Bartley LE, Cao P, Jung KH, Sharma MK, Vega-Sanchez M,  
797 Ronald P, Dardick CD, De Bodt S, Verelst W, Inzé D, Heese M, Schnittger A, Yang X,  
798 Kalluri UC, Tuskan GA, Hua Z, Vierstra RD, Cui Y, Ouyang S, Sun Q, Liu Z, Yilmaz A,  
799 Grotewold E, Sibout R, Hematy K, Mouille G, Höfte H, Micheel T, Pelloux J, O'Connor D,  
800 Schnable J, Rowe S, Harmon F, Cass CL, Sedbrook JC, Byrne ME, Walsh S, Higgins J, Li  
801 P, Brutnell T, Unver T, Budak H, Belcram H, Charles M, Chalhoub B, Baxter I. 2010.  
802 Genome sequencing and analysis of the model grass *Brachypodium distachyon*. *Nature*  
803 **463**:763–768. doi:10.1038/nature08747
- 804 The International Sheep Genomics Consortium, Archibald AL, Cockett NE, Dalrymple BP,  
805 Faraut T, Kijas JW, Maddox JF, McEwan JC, Hutton Oddy V, Raadsma HW, Wade C,  
806 Wang J, Wang W, Xun X. 2010. The sheep genome reference sequence: a work in progress.  
807 *Anim Genet* **41**:449–453. doi:10.1111/j.1365-2052.2010.02100.x
- 808 The Rice Annotation Project. 2007. Curated genome annotation of *Oryza sativa* ssp. japonica  
809 and comparative genome analysis with *Arabidopsis thaliana*. *Genome Res* **17**:175–183.  
810 doi:10.1101/gr.5509507.
- 811 Uhlenbruck G, Steinhausen G. 1977. Tridacnins: symbiosis-profit or defense-purpose? *Dev*  
812 *Comp Immunol* **1**:183–192.
- 813 Van Dongen S. 2000. Graph clustering by flow simulation. University of Utrecht.  
814 doi:10.1016/j.cosrev.2007.05.001
- 815 Vicentini A, Barber JC, Aliscioni SS, Giussani LM, Kellogg EA. 2008. The age of the grasses  
816 and clusters of origins of C4 photosynthesis. *Glob Chang Biol* **14**:2963–2977.  
817 doi:10.1111/j.1365-2486.2008.01688.x
- 818 Vogel J. 2008. Unique aspects of the grass cell wall. *Curr Opin Plant Biol* **11**:301–307.  
819 doi:10.1016/j.pbi.2008.03.002



- 820 Voragen AGJ, Coenen GJ, Verhoef RP, Schols HA. 2009. Pectin, a versatile polysaccharide  
821 present in plant cell walls. *Struct Chem* **20**:263–275. doi:10.1007/s11224-009-9442-z
- 822 Wade CM, Giulotto E, Sigurdsson S, Zoli M, Gnerre S, Imsland F, Lear TL, Adelson DL, Bailey  
823 E, Bellone RR. 2009. Genome sequence, comparative analysis, and population genetics of  
824 the domestic horse. *Science* **326**:865–867. doi:10.1126/science.1178158.Genome
- 825 Wang X, Liu X, Groenewald JZ. 2017. Phylogeny of anaerobic fungi (phylum  
826 Neocallimastigomycota), with contributions from yak in China. *Antonie Van Leeuwenhoek*  
827 **110**:87–103. doi:10.1007/s10482-016-0779-1
- 828 Wang Y, White M, Moncalvo J. n.d. Divergence time estimation of the gut fungi *Smittium*  
829 (Harpellales) suggests a co-emergence with the complete metamorphosis of their lower  
830 Diptera (fly) hosts. *Rev.*
- 831 Wang Y, White MM, Kvist S, Moncalvo J-M. 2016. Genome-wide survey of gut fungi  
832 (Harpellales) reveals the first horizontally transferred ubiquitin gene from a mosquito host.  
833 *Mol Biol Evol* **33**:2544–2554. doi:10.1093/molbev/msw126
- 834 Weston BS, Bagn ris C, Price RG, Stirling JL. 2001. The polycystin-1 C-type lectin domain  
835 binds carbohydrate in a calcium-dependent manner, and interacts with extracellular matrix  
836 proteins in vitro. *Biochim Biophys Acta - Mol Basis Dis* **1536**:161–176. doi:10.1016/S0925-  
837 4439(01)00046-1
- 838 Weston BS, Malhas AN, Price RG. 2003. Structure-function relationships of the extracellular  
839 domain of the autosomal dominant polycystic kidney disease-associated protein, polycystin-  
840 1. *FEBS Lett* **538**:8–13. doi:10.1016/S0014-5793(03)00130-3
- 841 Xiao C, Anderson CT. 2013. Roles of pectin in biomass yield and processing for biofuels. *Front*  
842 *Plant Sci* **4**:1–7. doi:10.3389/fpls.2013.00067
- 843 Yarlett N, Orpin CG, Munn EA, Yarlett NC, Greenwood CA. 1986. Hydrogenosomes in the  
844 rumen fungus *Neocallimastix patriciarum*. *Biochem J* **236**:729–739. doi:10.1042/bj2360729
- 845 Yoshino-Yasuda S, Karita S, Kato M, Kitamoto N. 2012. Sequence analysis and heterologous  
846 expression of rhamnogalacturonan lyase A gene (*Asrg1A*) from *Shoyu Koji* Mold,  
847 *Aspergillus sojae* KBN1340. *Food Sci Technol Res* **18**:901–909. doi:10.3136/fstr.18.901
- 848 Youssef NH, Couger MB, Struchtemeyer CG, Liggenstoffer AS, Prade RA, Najjar FZ, Atiyeh  
849 HK, Wilkins MR, Elshahed MS. 2013. The genome of the anaerobic fungus orpinomyces  
850 sp. strain c1a reveals the unique evolutionary history of a remarkable plant biomass  
851 degrader. *Appl Environ Microbiol* **79**:4620–4634. doi:10.1128/AEM.00821-13
- 852 Zerbino DR, Achuthan P, Akanni W, Amode MR, Barrell D, Bhai J, Billis K, Cummins C, Gall  
853 A, Gir n CG, Gil L, Gordon L, Haggerty L, Haskell E, Hourlier T, Izuogu OG, Janacek SH,  
854 Juettemann T, To JK, Laird MR, Lavidas I, Liu Z, Loveland JE, Maurel T, McLaren W,  
855 Moore B, Mudge J, Murphy DN, Newman V, Nuhn M, Ogeh D, Ong CK, Parker A,  
856 Patricio M, Riat HS, Schuilenburg H, Sheppard D, Sparrow H, Taylor K, Thormann A,



857 Vullo A, Walts B, Zadissa A, Frankish A, Hunt SE, Kostadima M, Langridge N, Martin FJ,  
858 Muffato M, Perry E, Ruffier M, Staines DM, Trevanion SJ, Aken BL, Cunningham F, Yates  
859 A, Flicek P. 2018. Ensembl 2018. *Nucleic Acids Res* **46**:D754–D761.  
860 doi:10.1093/nar/gkx1098

861 Zimin A V., Puiu D, Luo M-C, Zhu T, Koren S, A.Yorke J, Dvorak J, Salzberg SL. 2017. Hybrid  
862 assembly of the large and highly repetitive genome of *Aegilops tauschii*, a progenitor of  
863 bread wheat, with the MaSuRCA mega-reads algorithm. *Genome Res* **27**:787–792.  
864 doi:10.1101/066100

865

## 866 **Figure Legends**

867 **Figure 1.** Bayesian phylogenomic Maximum Clade Credibility tree of Neocallimastigomycota  
868 with divergence time estimation. All clades are fully supported by Bayesian posterior  
869 probabilities (BPP). For clarity, mean ages and 95% highest-probability density ranges (blue  
870 bars) are denoted on the nodes above the rank of genus.

871 **Figure 2.** Cladogram and heatmap enrichment of the Pfam domains between  
872 Neocallimastigomycota and Chytridiomycota. (a) Cladogram showing the phylogenetic  
873 relationship of the compared taxa (Neocallimastigomycota genomes are in bold, transcriptomes  
874 in standard type); (b) Heatmap plot of natural logarithm of the domain copy numbers showing  
875 the ones uniquely gained in Neocallimastigomycota (suggested HGT elements are in blue); (c)  
876 Pfam domains highly enriched in Neocallimastigomycota; and (d) Pfam domains absent in  
877 Neocallimastigomycota (presented domains are partial; see Table S1 for the full list).

878 **Figure 3.** Mid-point rooted phylogenetic tree of the “Cthe\_2159” domain. All 126  
879 Neocallimastigomycota (AGF) copies (copies that >90% identities have been removed) form a  
880 single clade (red) indicating the HGT donor, *Clostridiales bacterium C5EMF8* (an obligate  
881 rumen bacterium), with strong support of maximum likelihood bootstrap (98/100). Included  
882 bacterial lineages were assigned different colors according to their phylogenetic classification  
883 (see legend for detailed information; the complete tree with all tip information is in the Figure  
884 S3).

885 **Figure 4.** Phylogenetic tree of the 83 “Cthe\_2159” domains identified in five AGF genomes  
886 based on protein sequences (rooted with the closest related bacterial homolog). Domain maps on  
887 the right shows the conserved domains produced by the “Cthe\_2159” containing genes.

888 **Figure 5.** Phylogenetic tree of the animal-like “Gal-Lectin” domain identified in  
889 Neocallimastigomycota. (a) Collapsed phylogenetic tree based on protein sequences (rooted with  
890 the bacterial outgroup), including clades of Neocallimastigomycota (red), Animals (blue; three  
891 clades are labeled as 1-3), plants (green), and bacteria (brown) (A complete tree with all tip  
892 information is in the Figure S4); (b) Schematic diagrams showing the “Gal\_Lectin” and other  
893 conserved domains on the same protein in each clade individually (dotted box highlights the  
894 aligned region used to produce the phylogenetic tree).

895 **Figure 6.** Radial phylogenetic tree of the “Rhamnogal\_lyase” domain encoded by the  
896 Neocallimastigomycota (red). Plant copies are colored in green and other homologous fungal  
897 genes are colored in brown. Oomycetes are in cyan and animal copies only known in the  
898 mountain pine beetles *Dendroctonus ponderosae* are in blue. Bacterial branches remain in black.  
899 The tree also included homologs of “RhgB\_N” and “Rhamnogalacturonan lyase A, B, and C”.  
900 Domain names are suggested using NCBI’s conserved domain search tool (cutoff  $1E^{-5}$ ) with  
901 unaligned FASTA sequences (refer to the Figure S6 for a tree with detailed information).

902

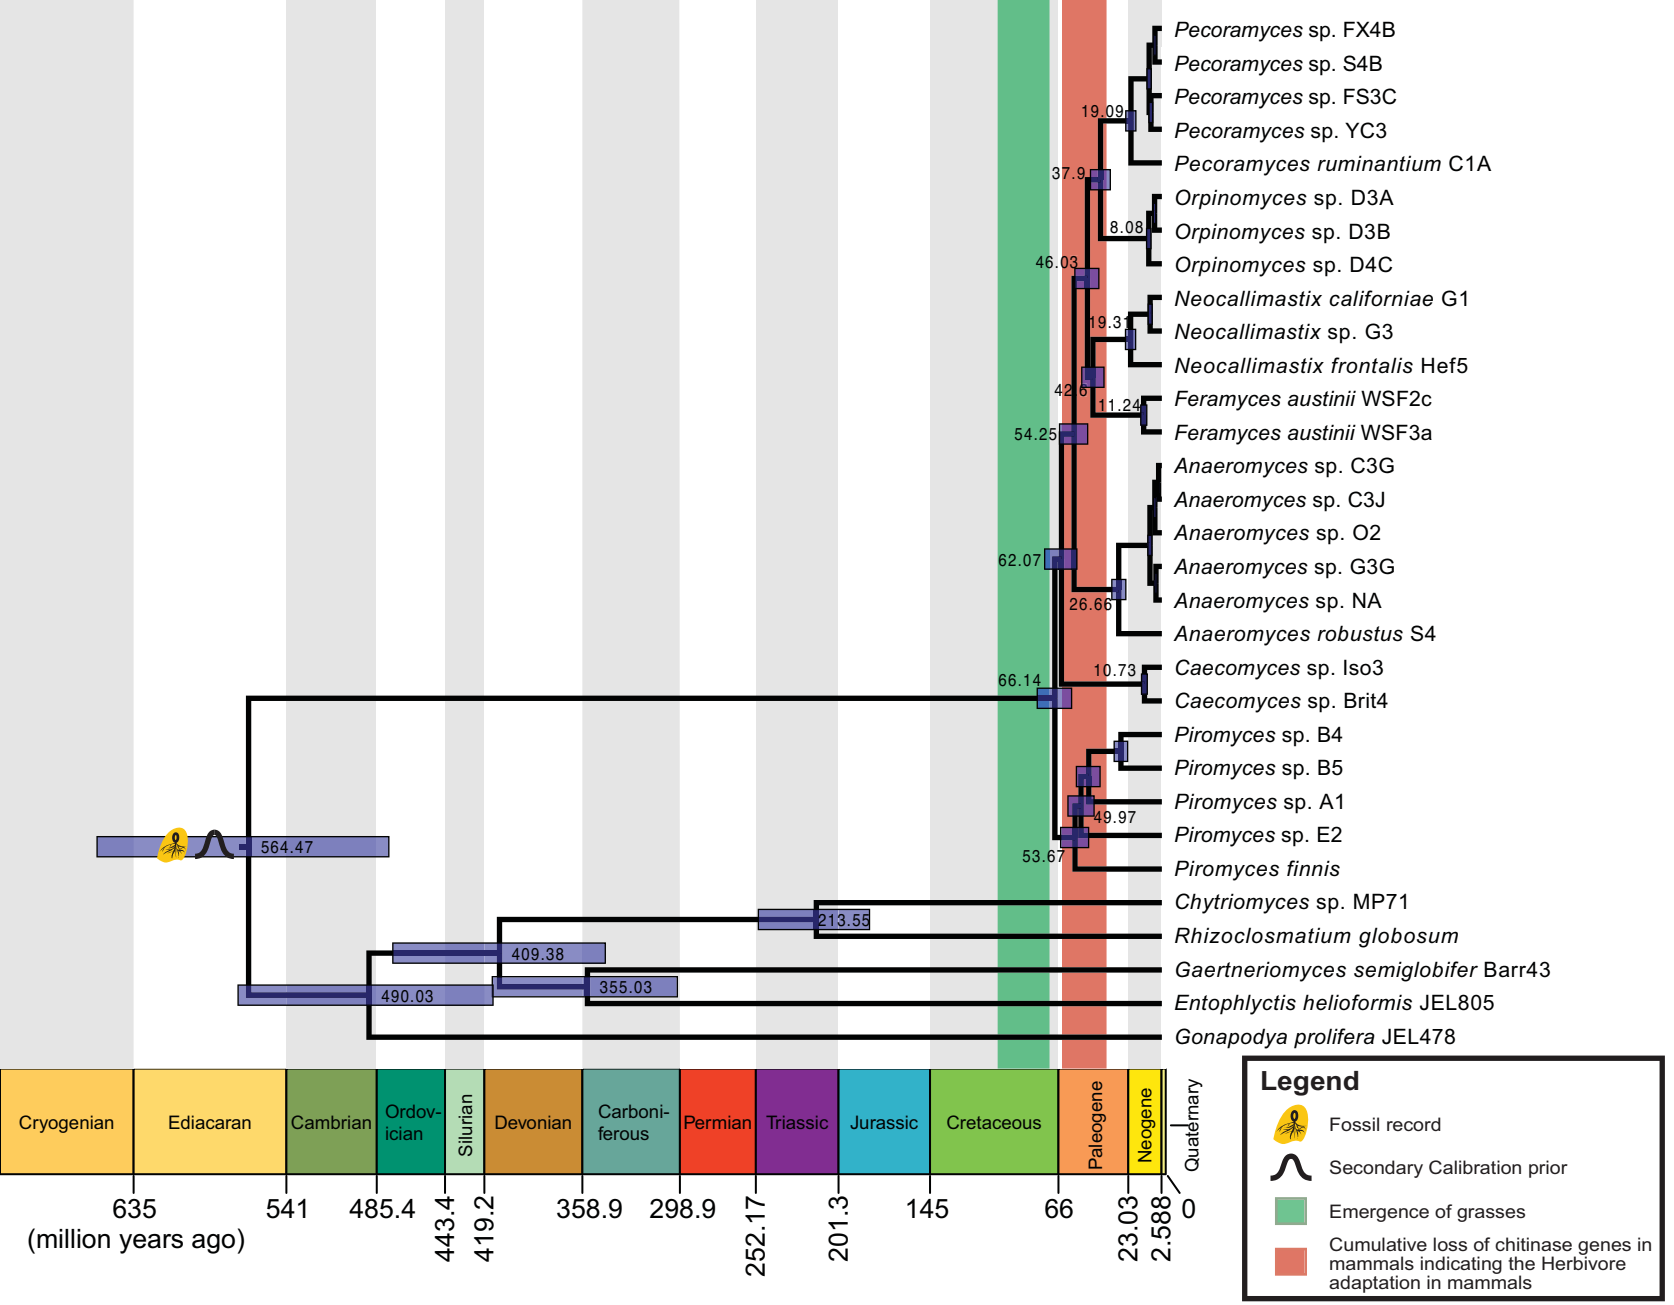

(a)

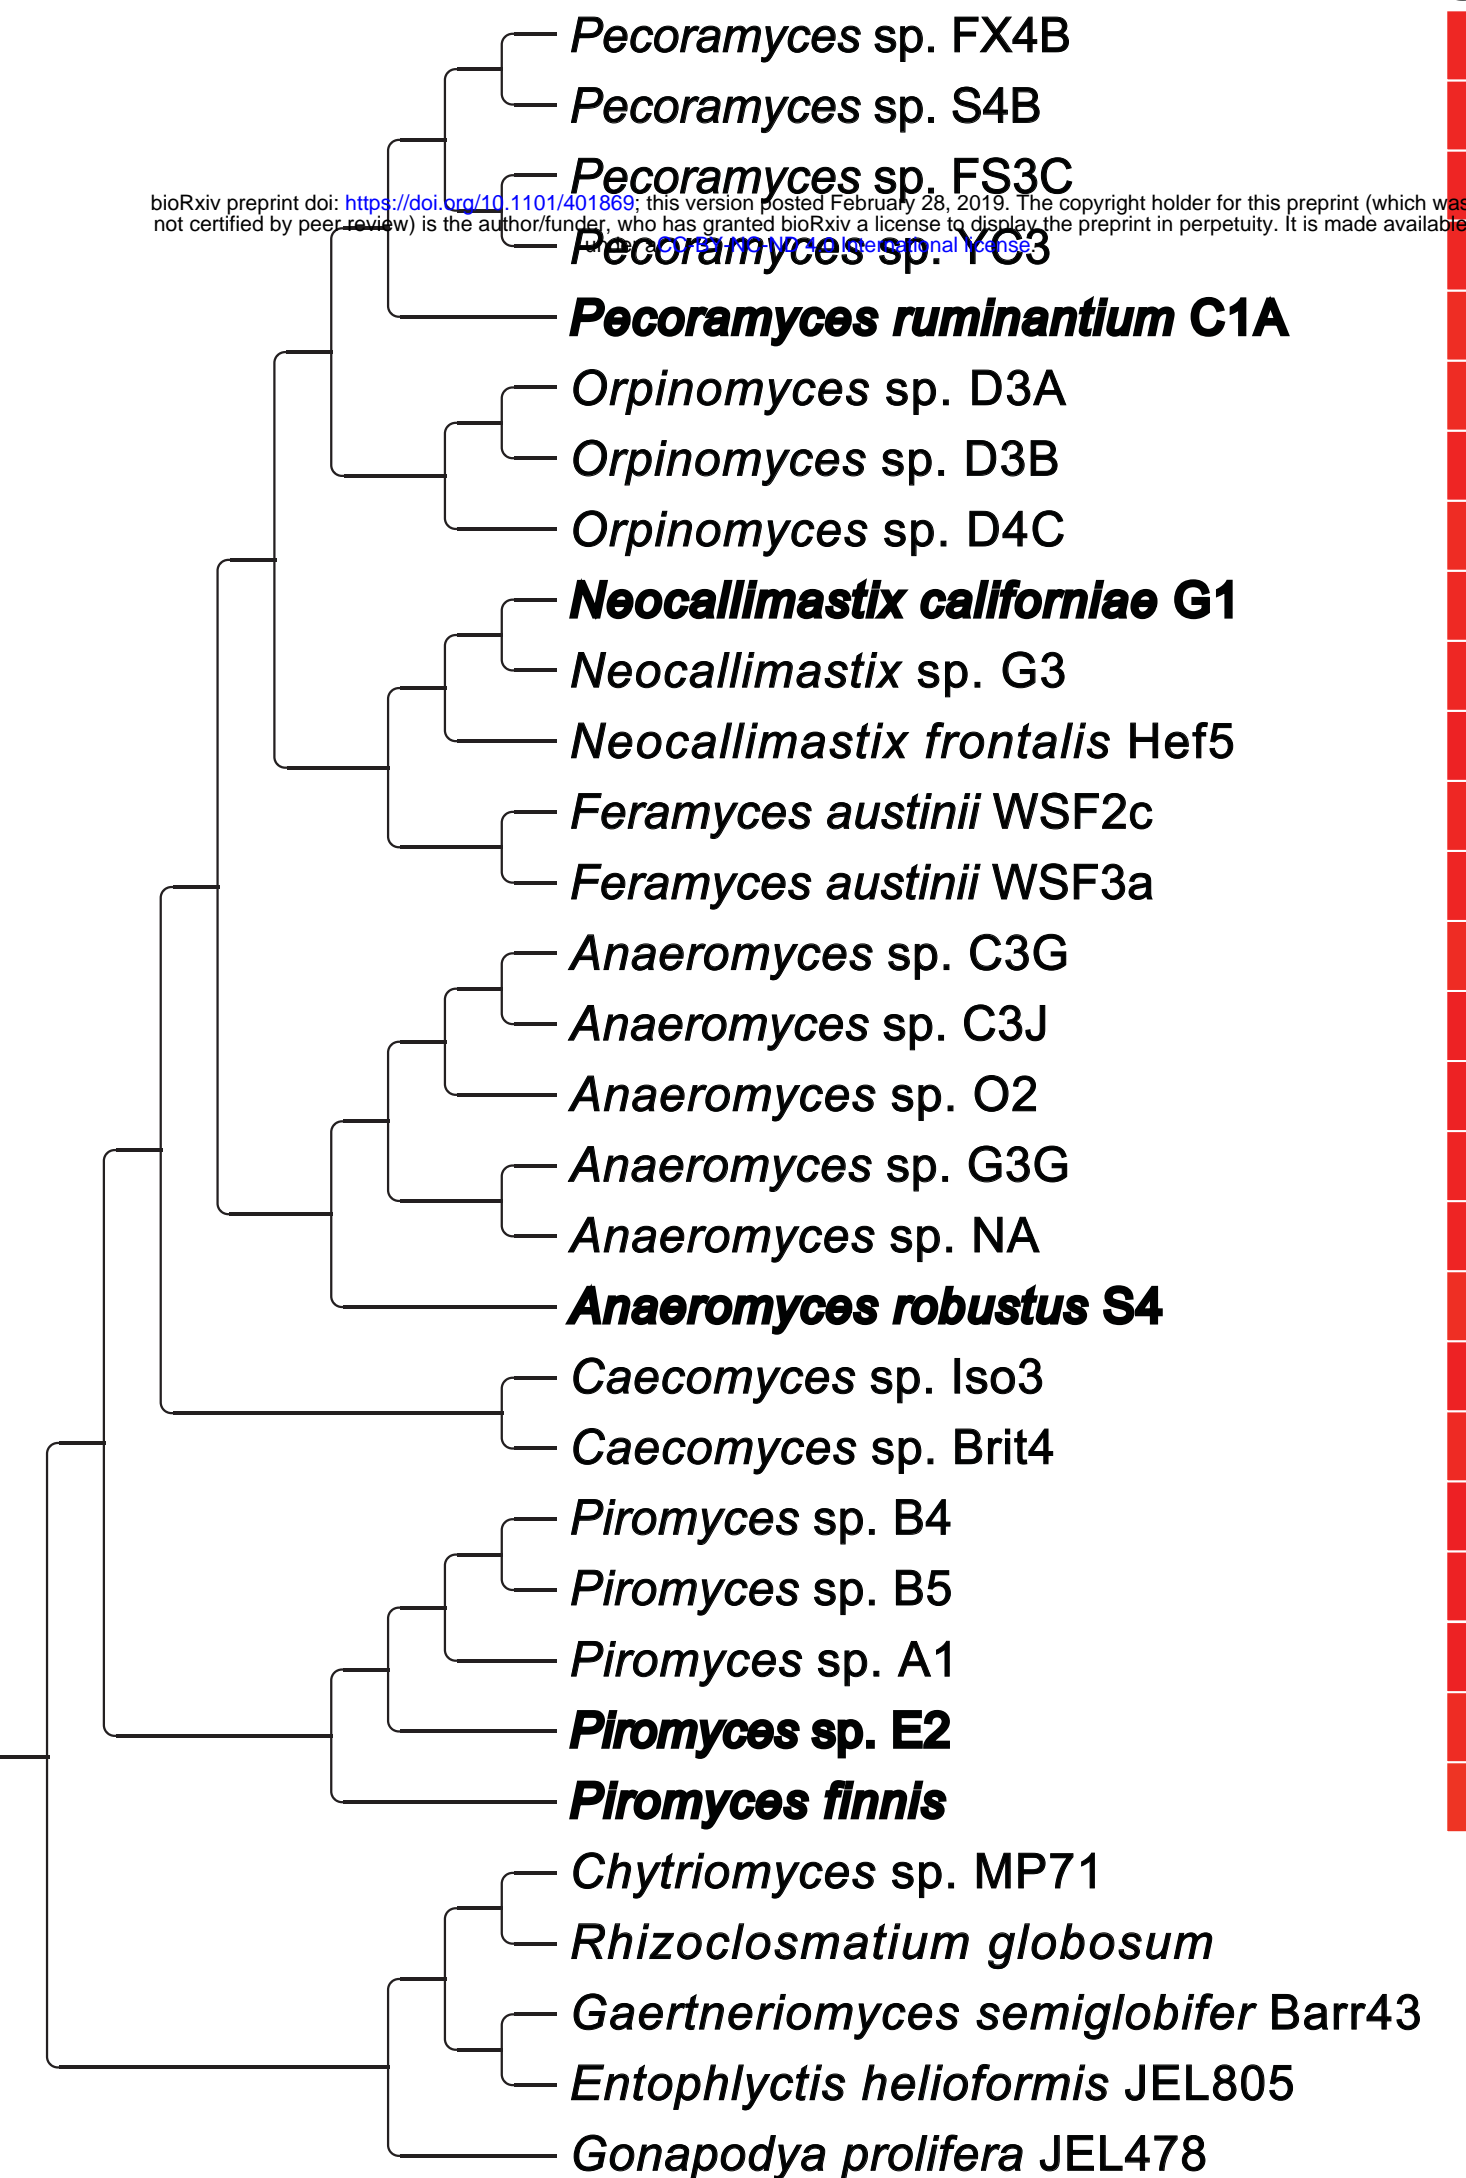

(b)

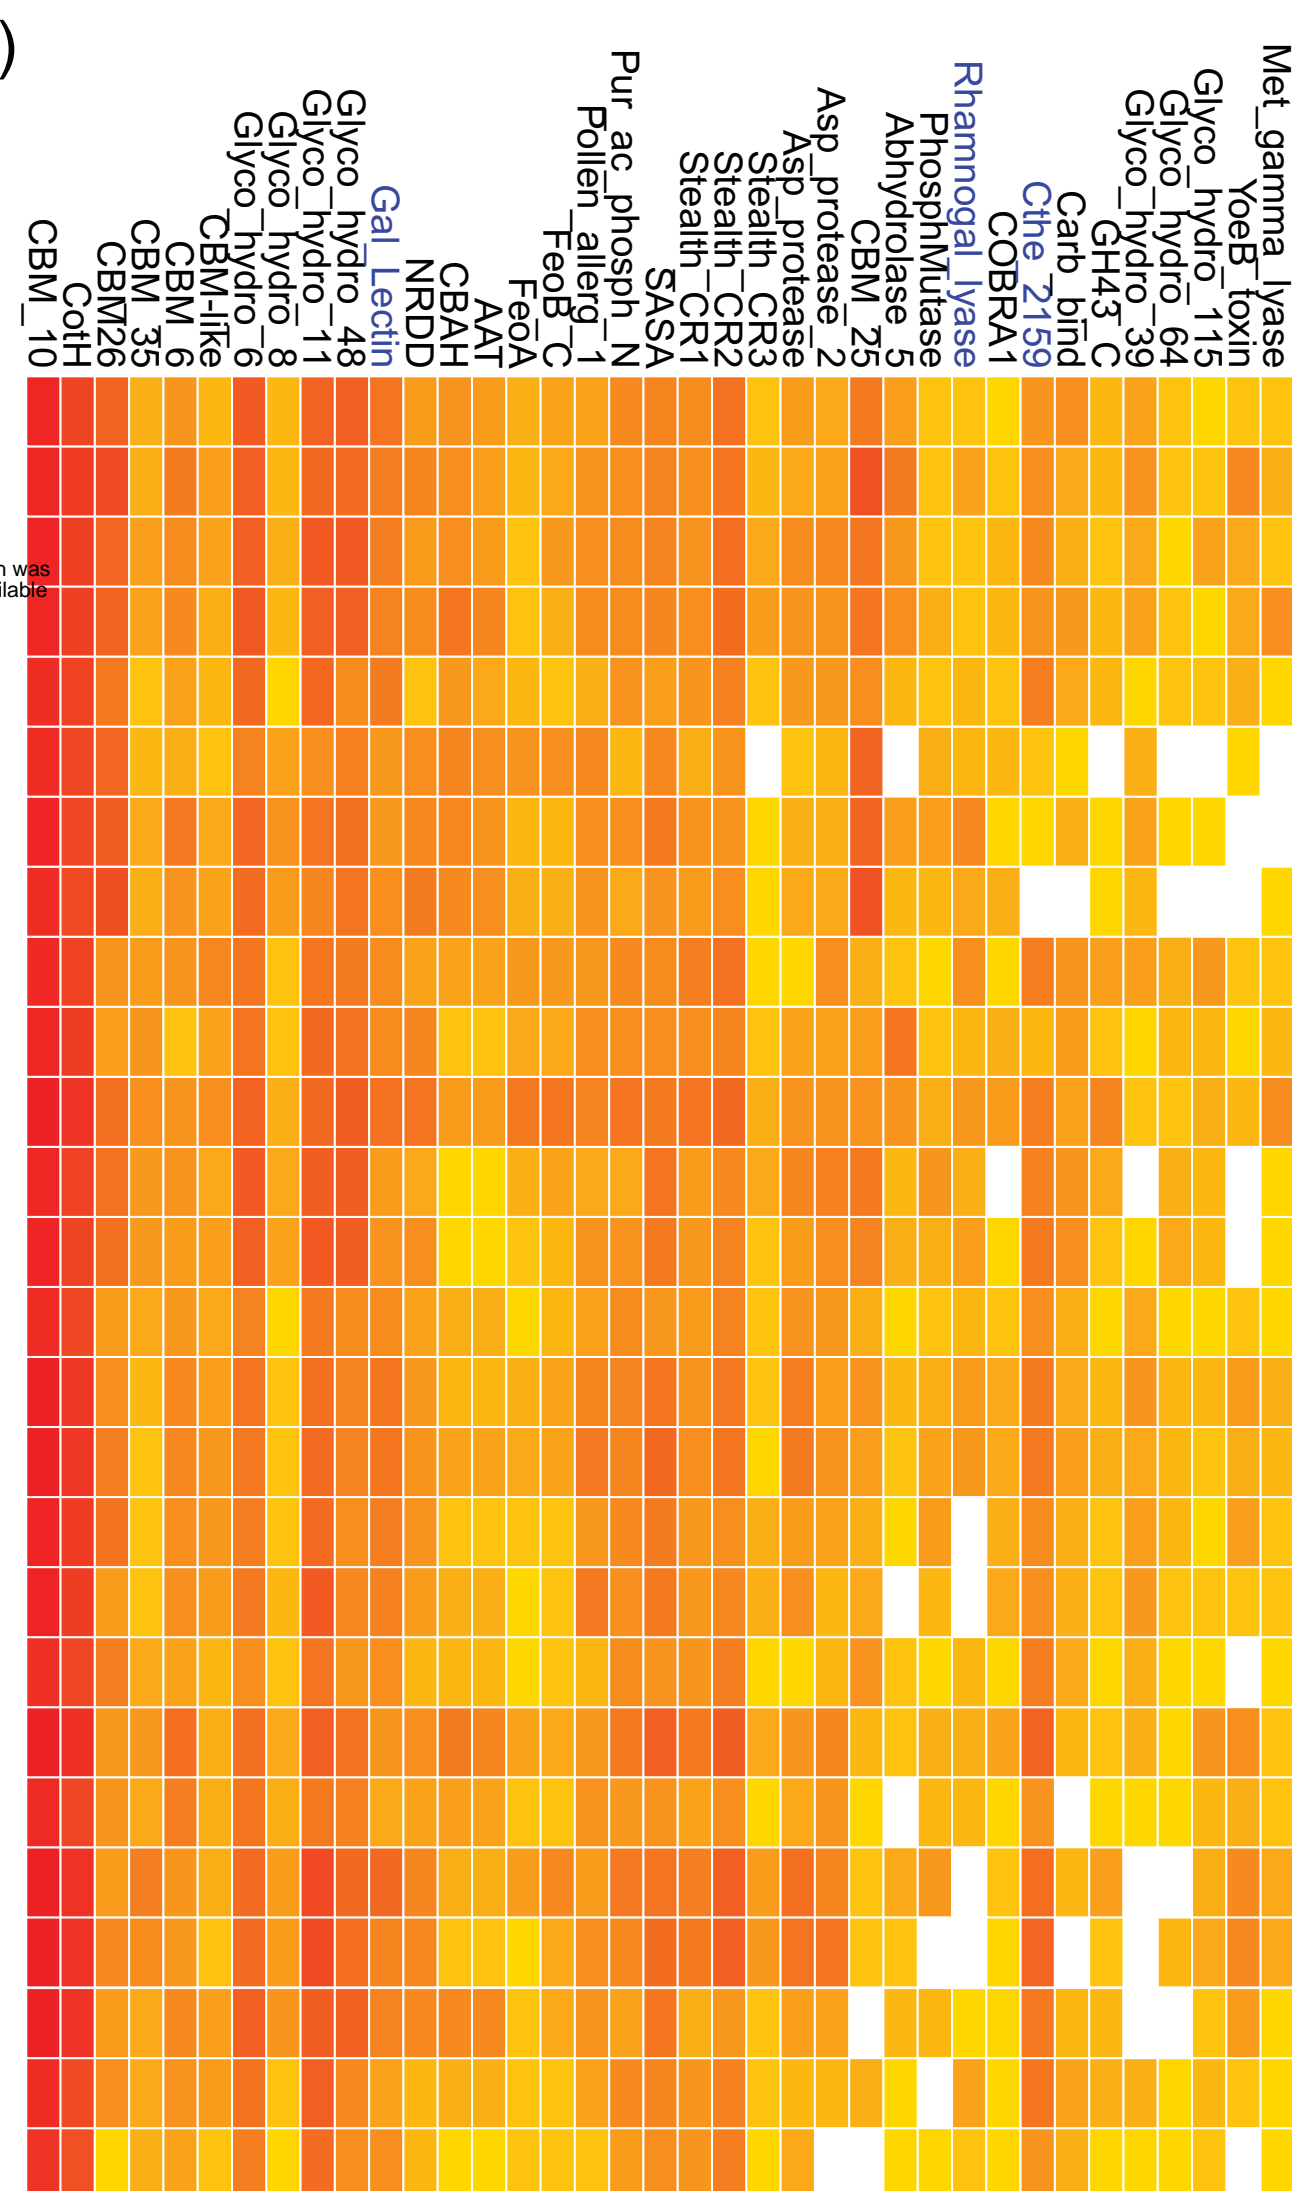

(c)

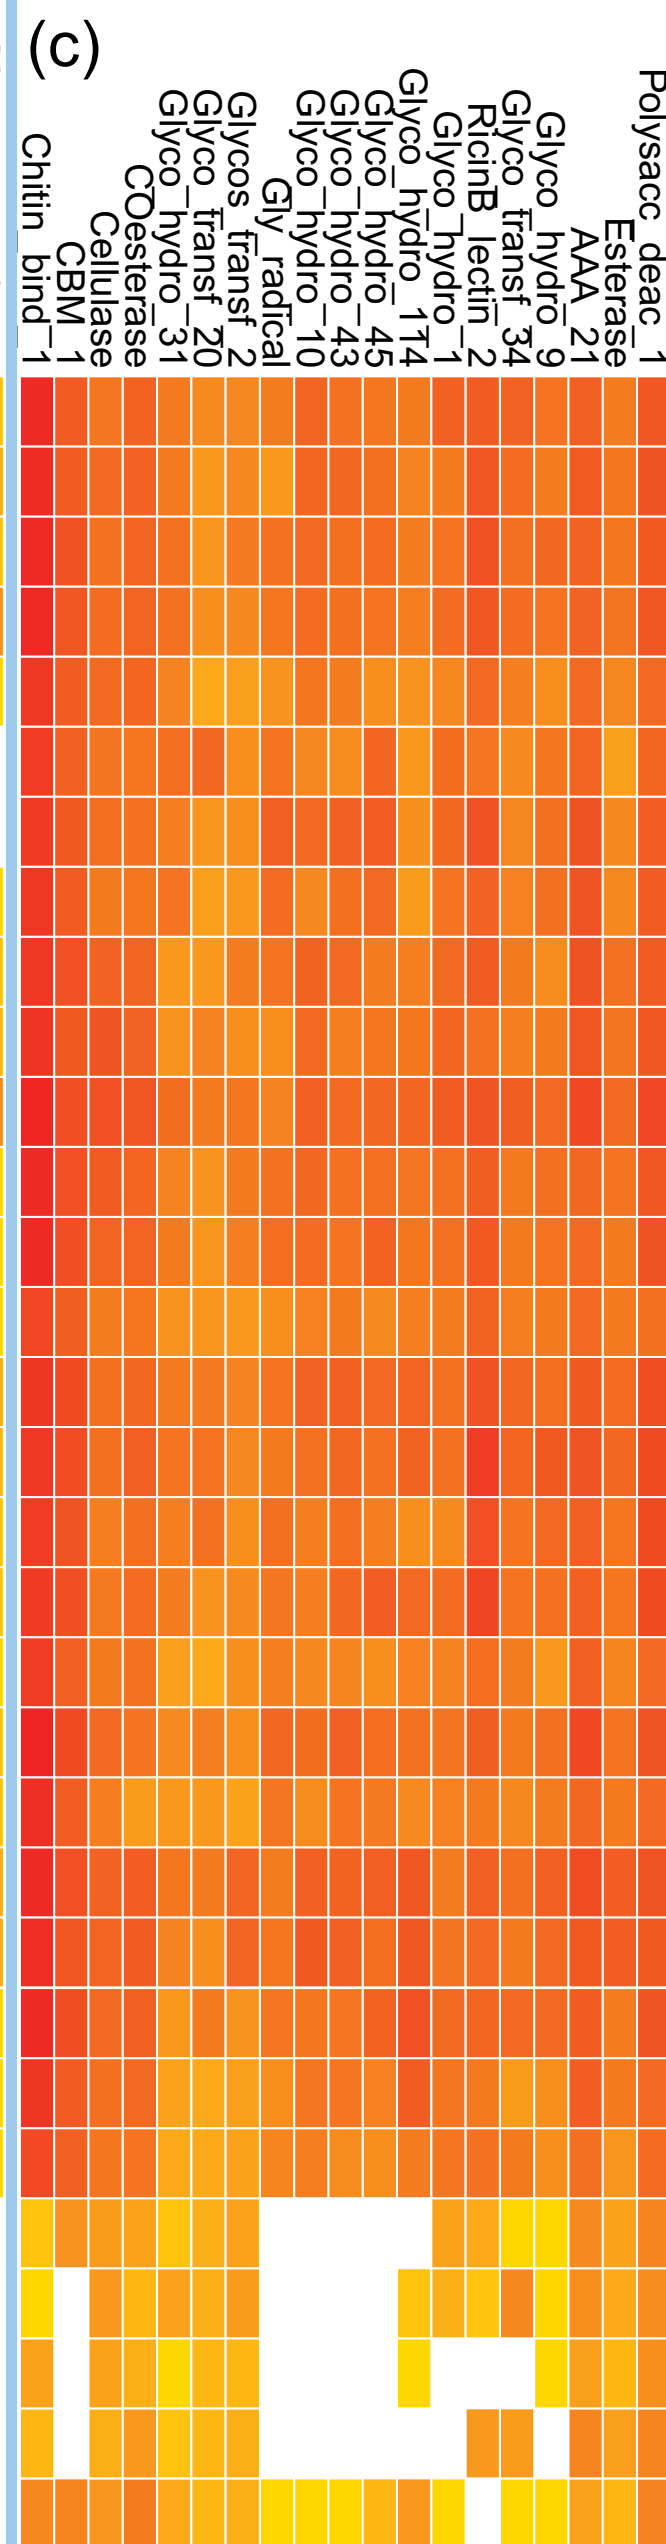

(d)

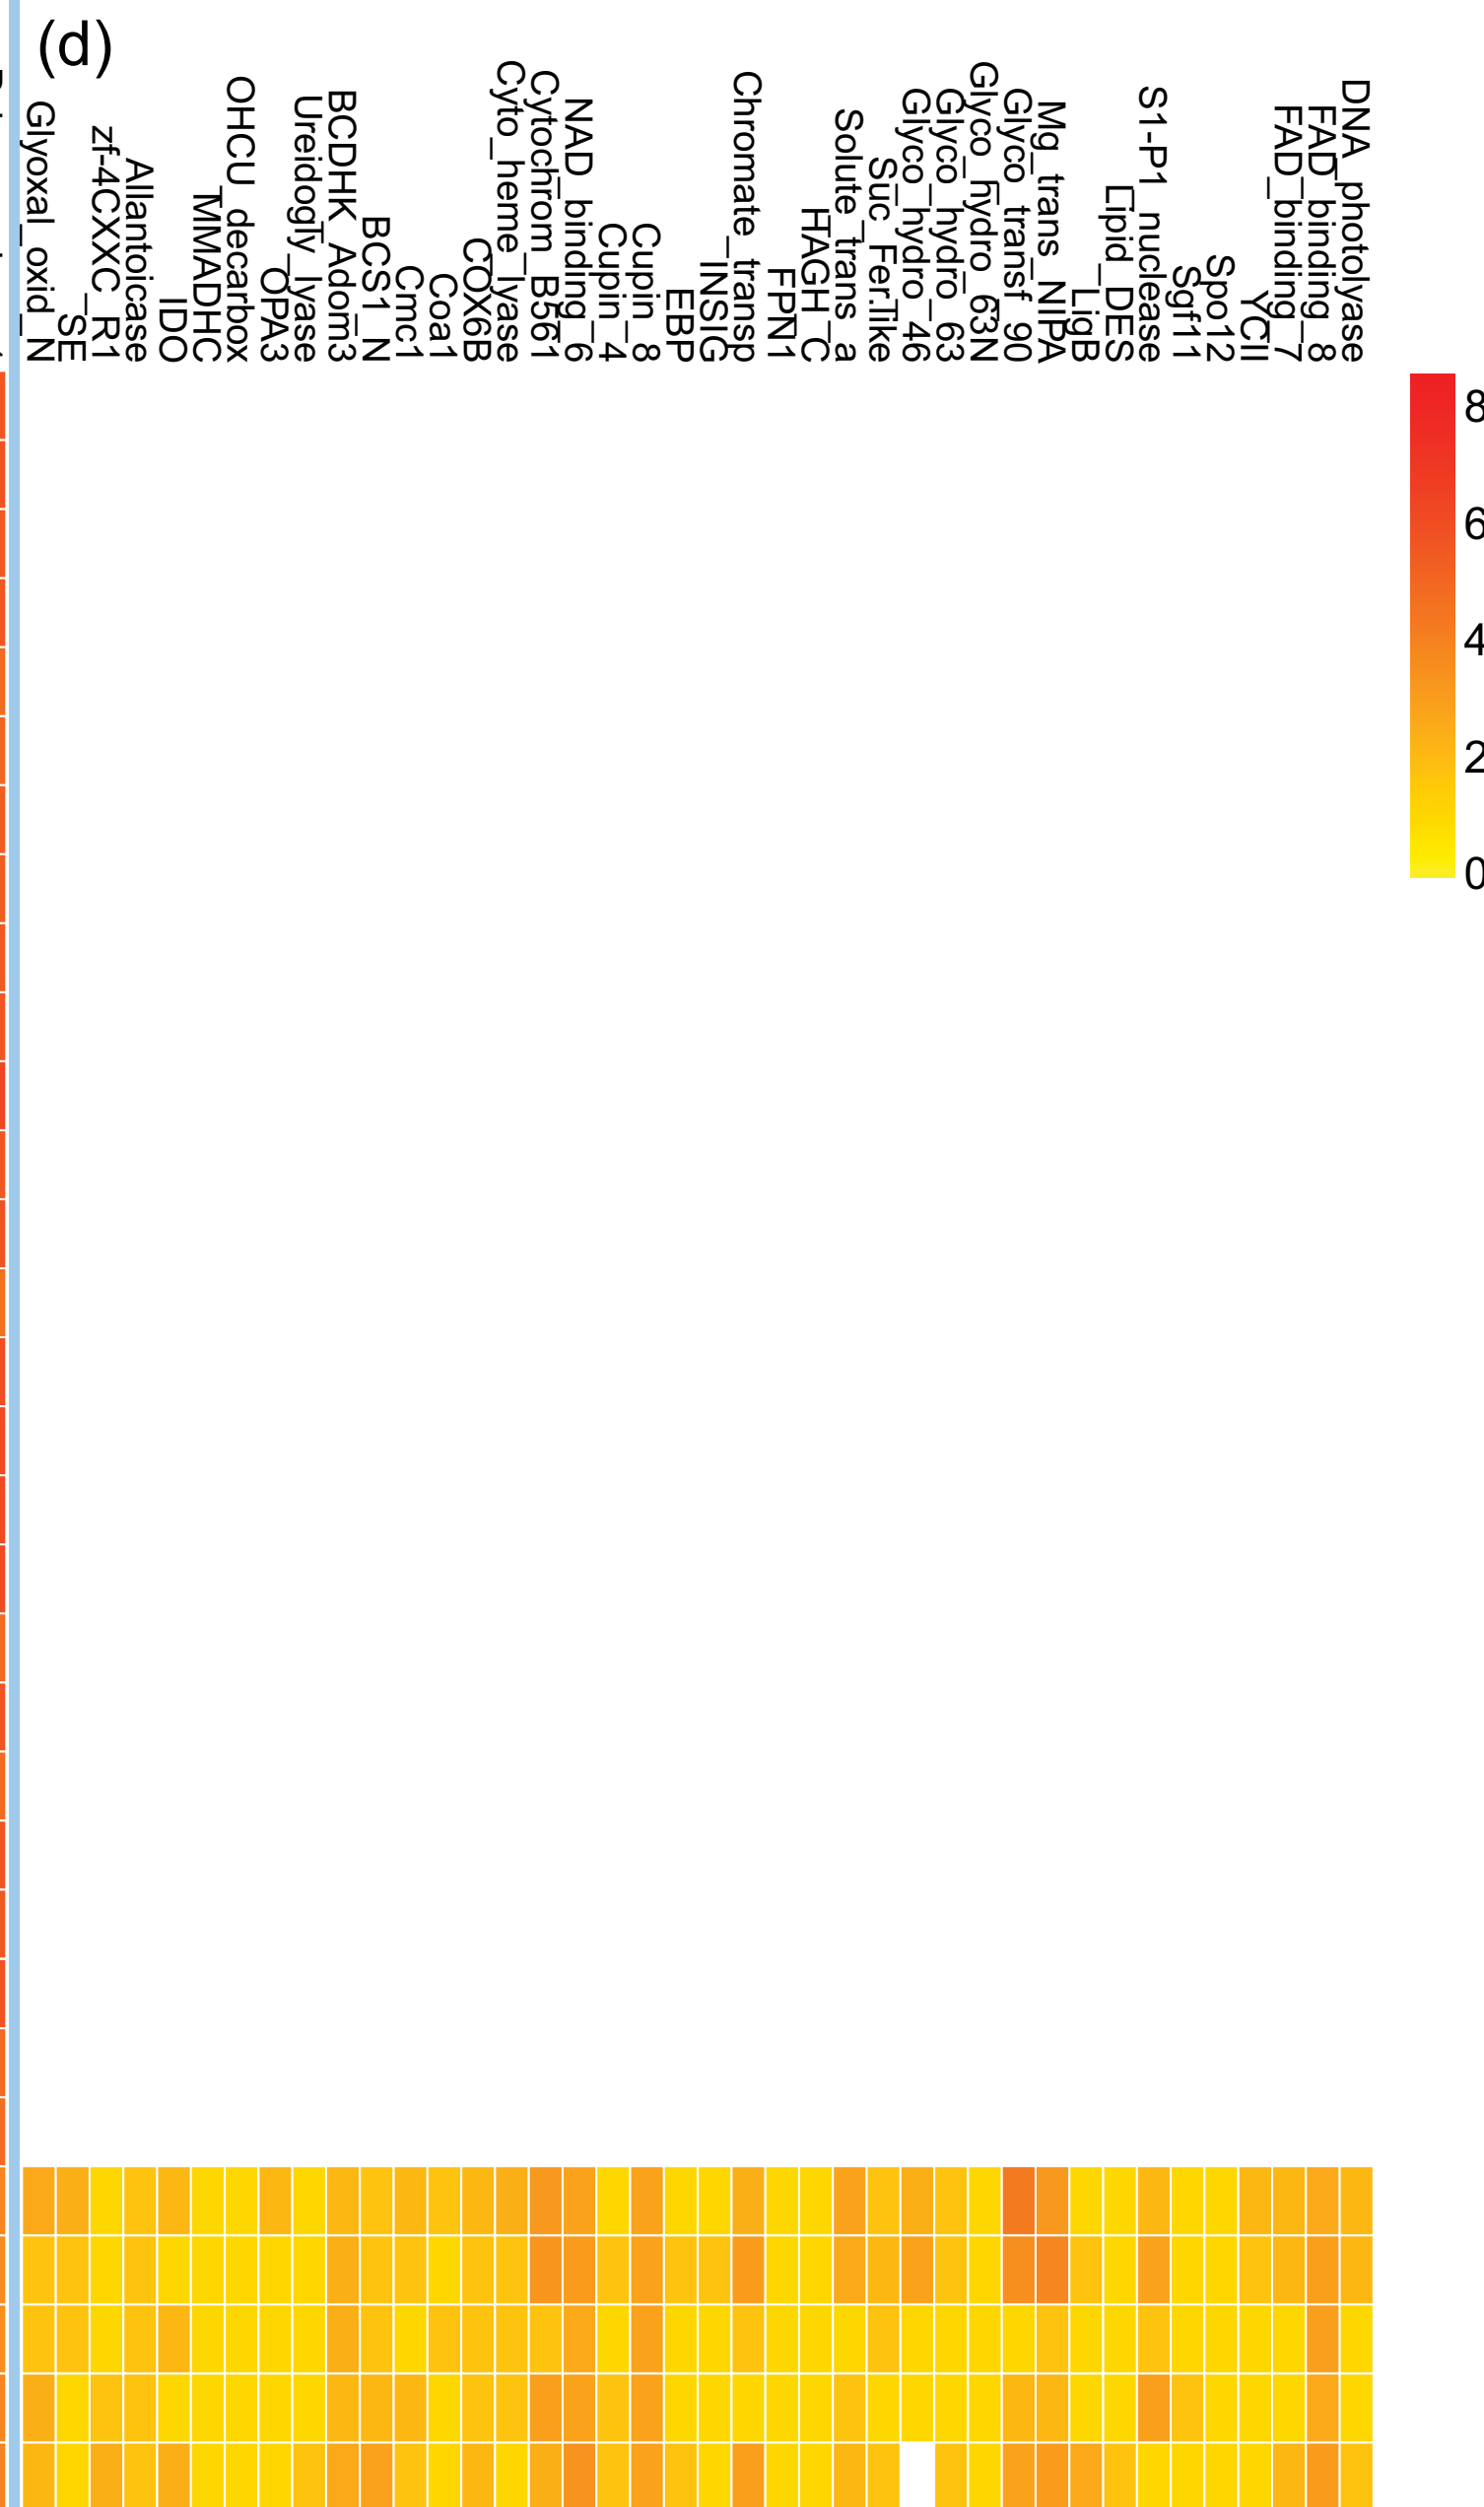

Heatmap of the genome-wide enriched Pfam domains (natural logarithm)

126 AGF copies (from both genomes and transcriptomes)

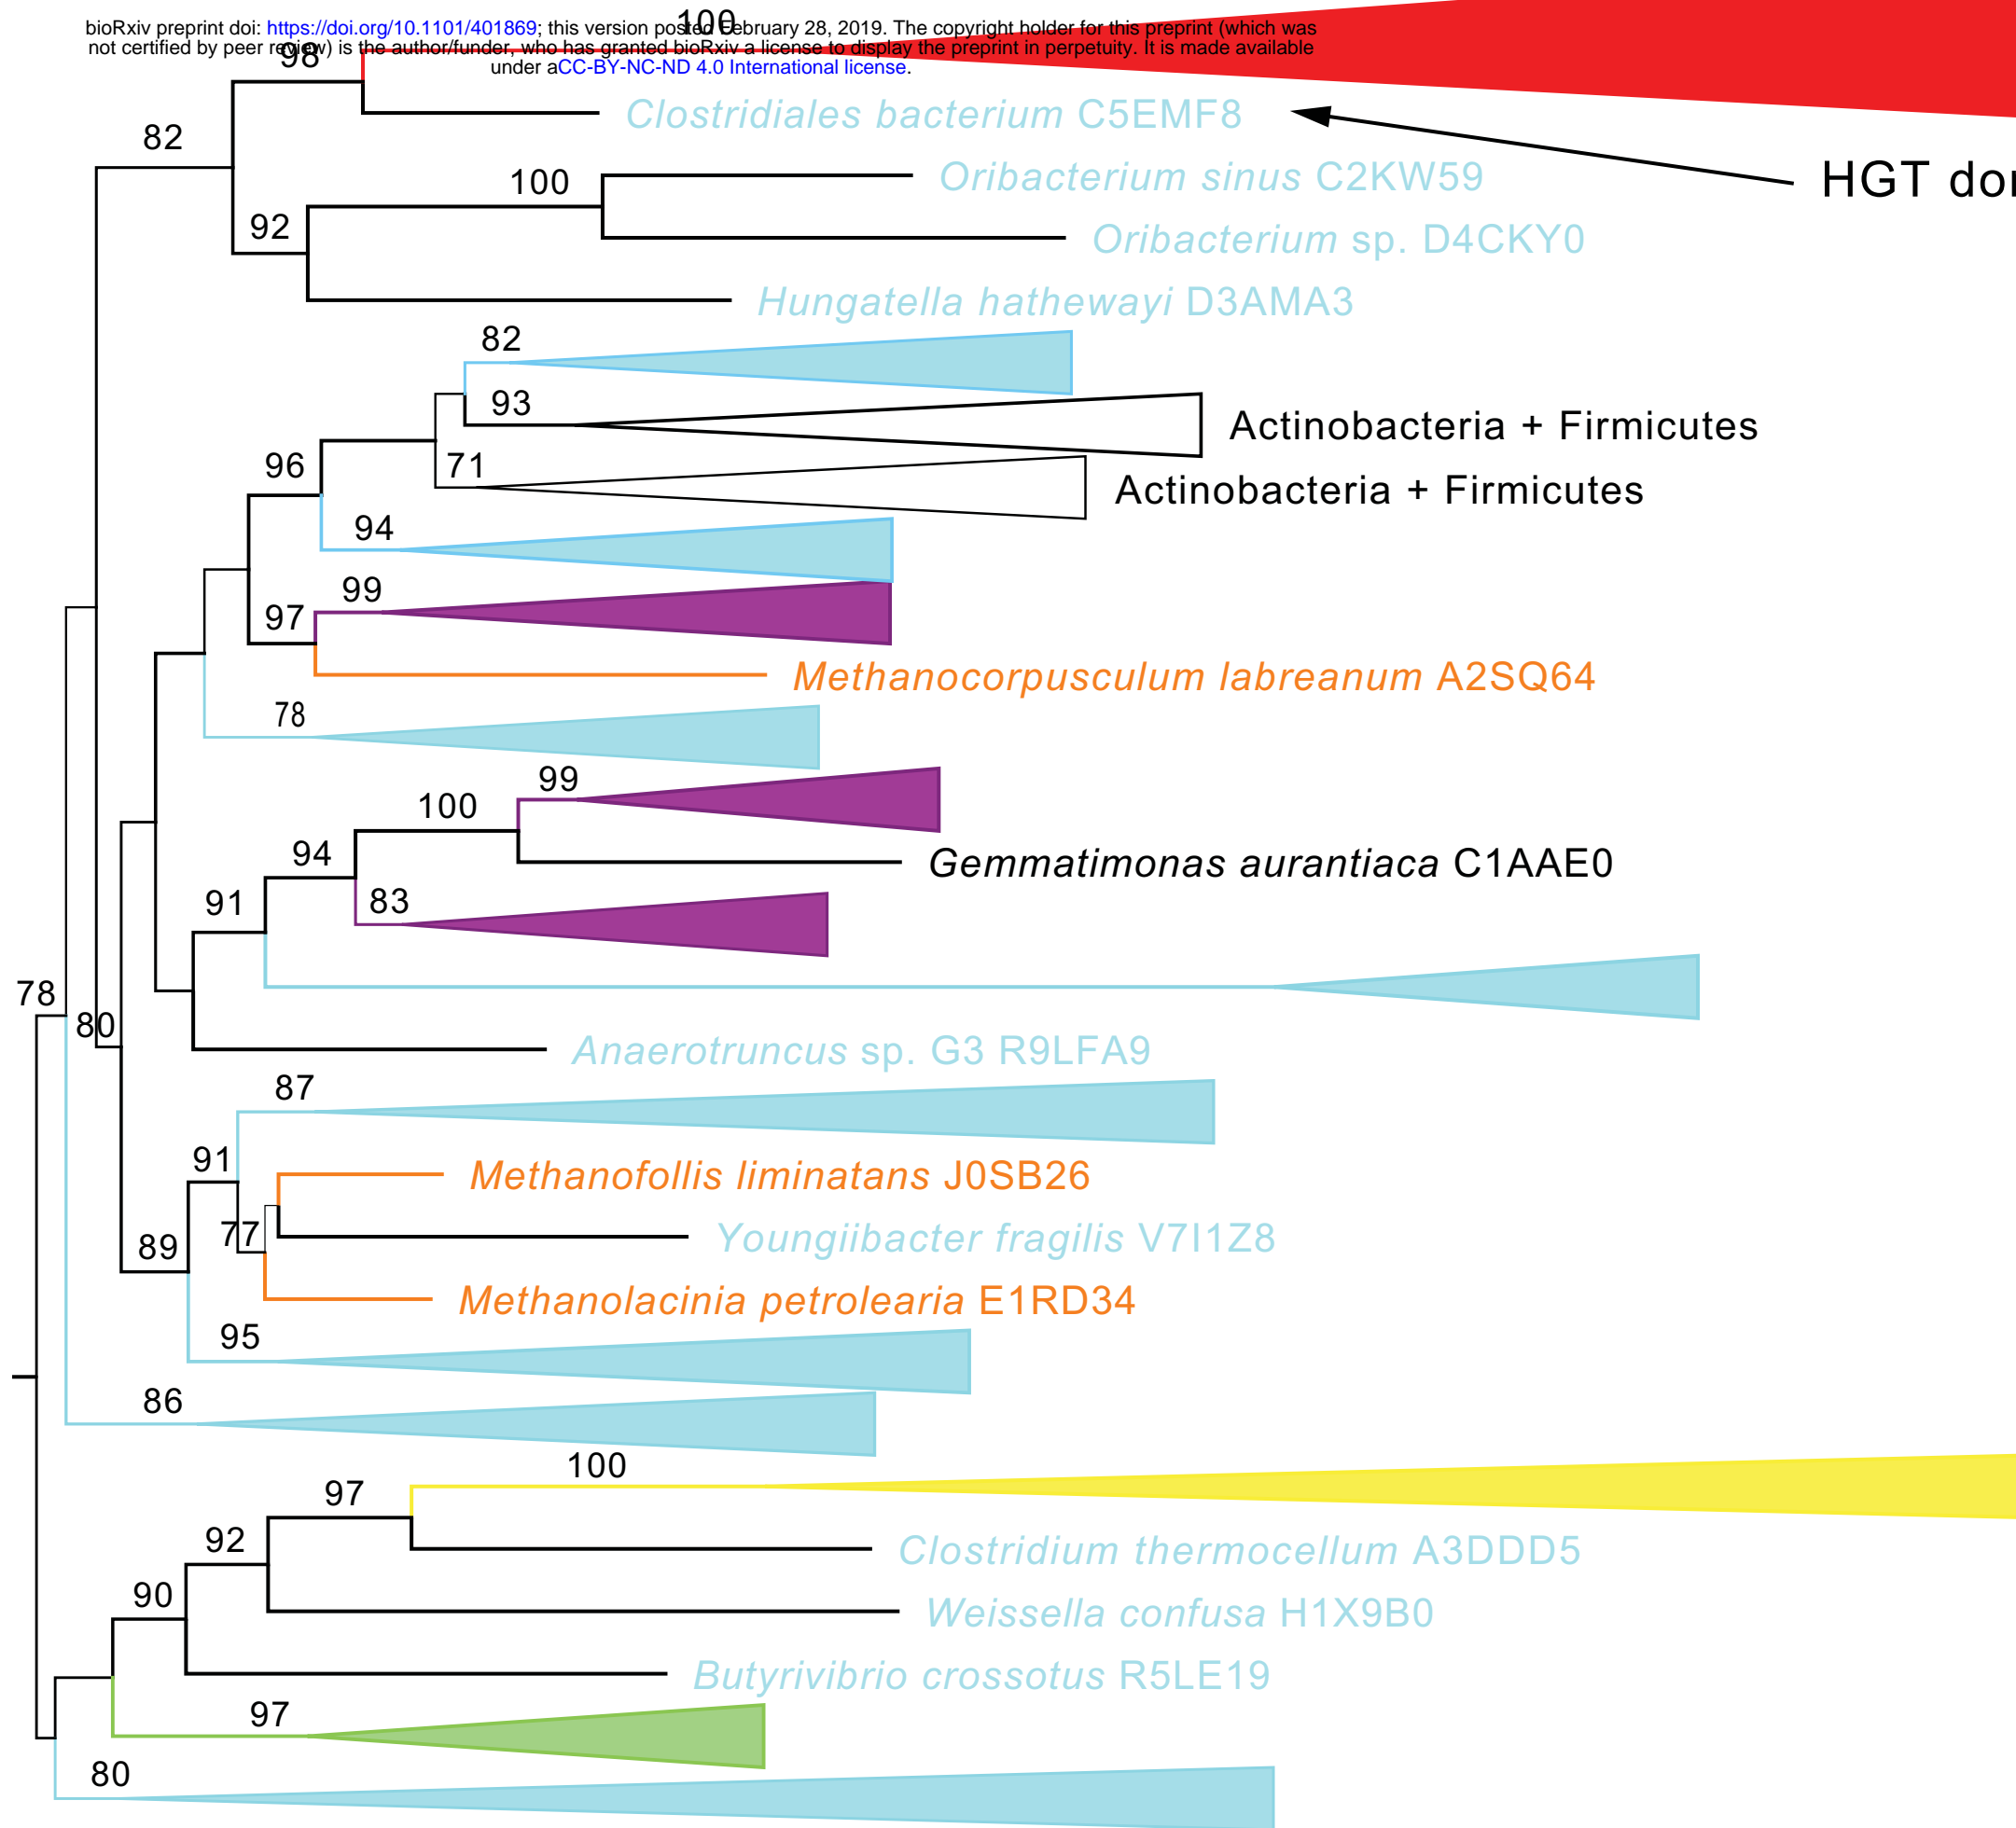

HGT donor: rumen bacterium

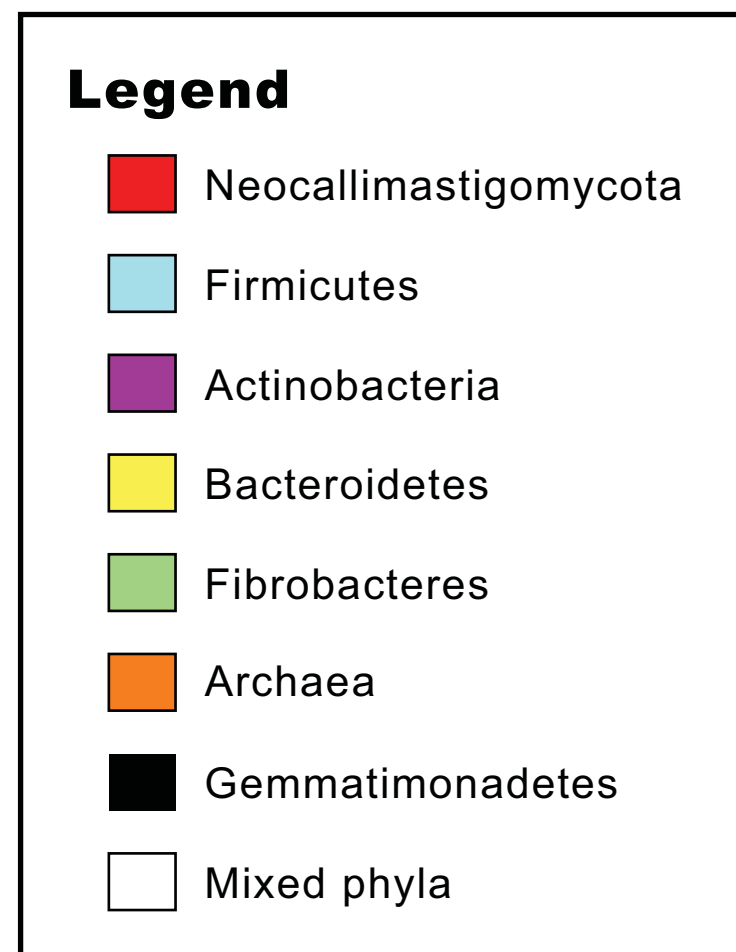

bioRxiv preprint doi: <https://doi.org/10.1101/401869>; this version posted February 28, 2019. The copyright holder for this preprint (which was not certified by peer review) is the author/funder, who has granted bioRxiv a license to display the preprint in perpetuity. It is made available under aCC-BY-NC-ND 4.0 International license.

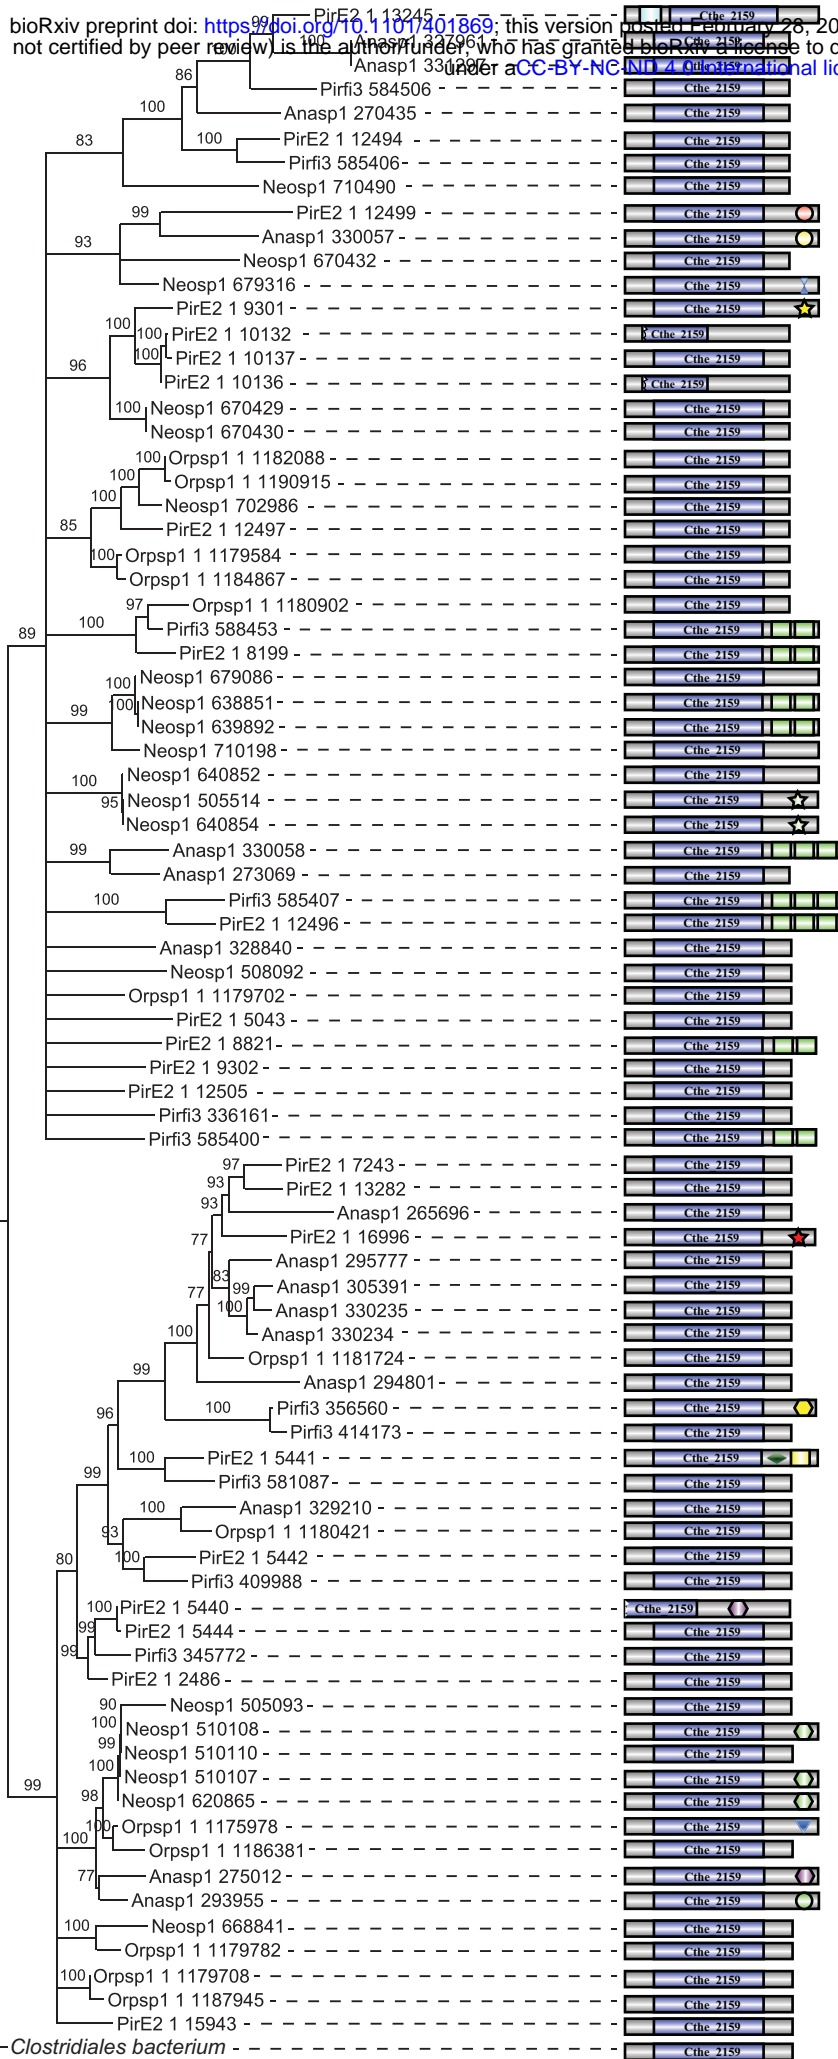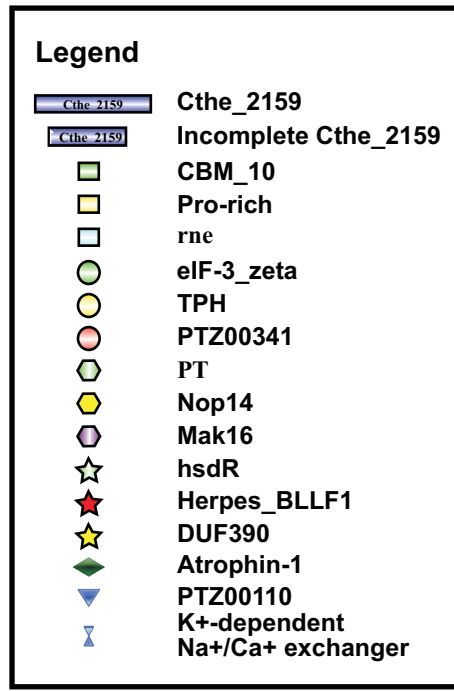



(a)

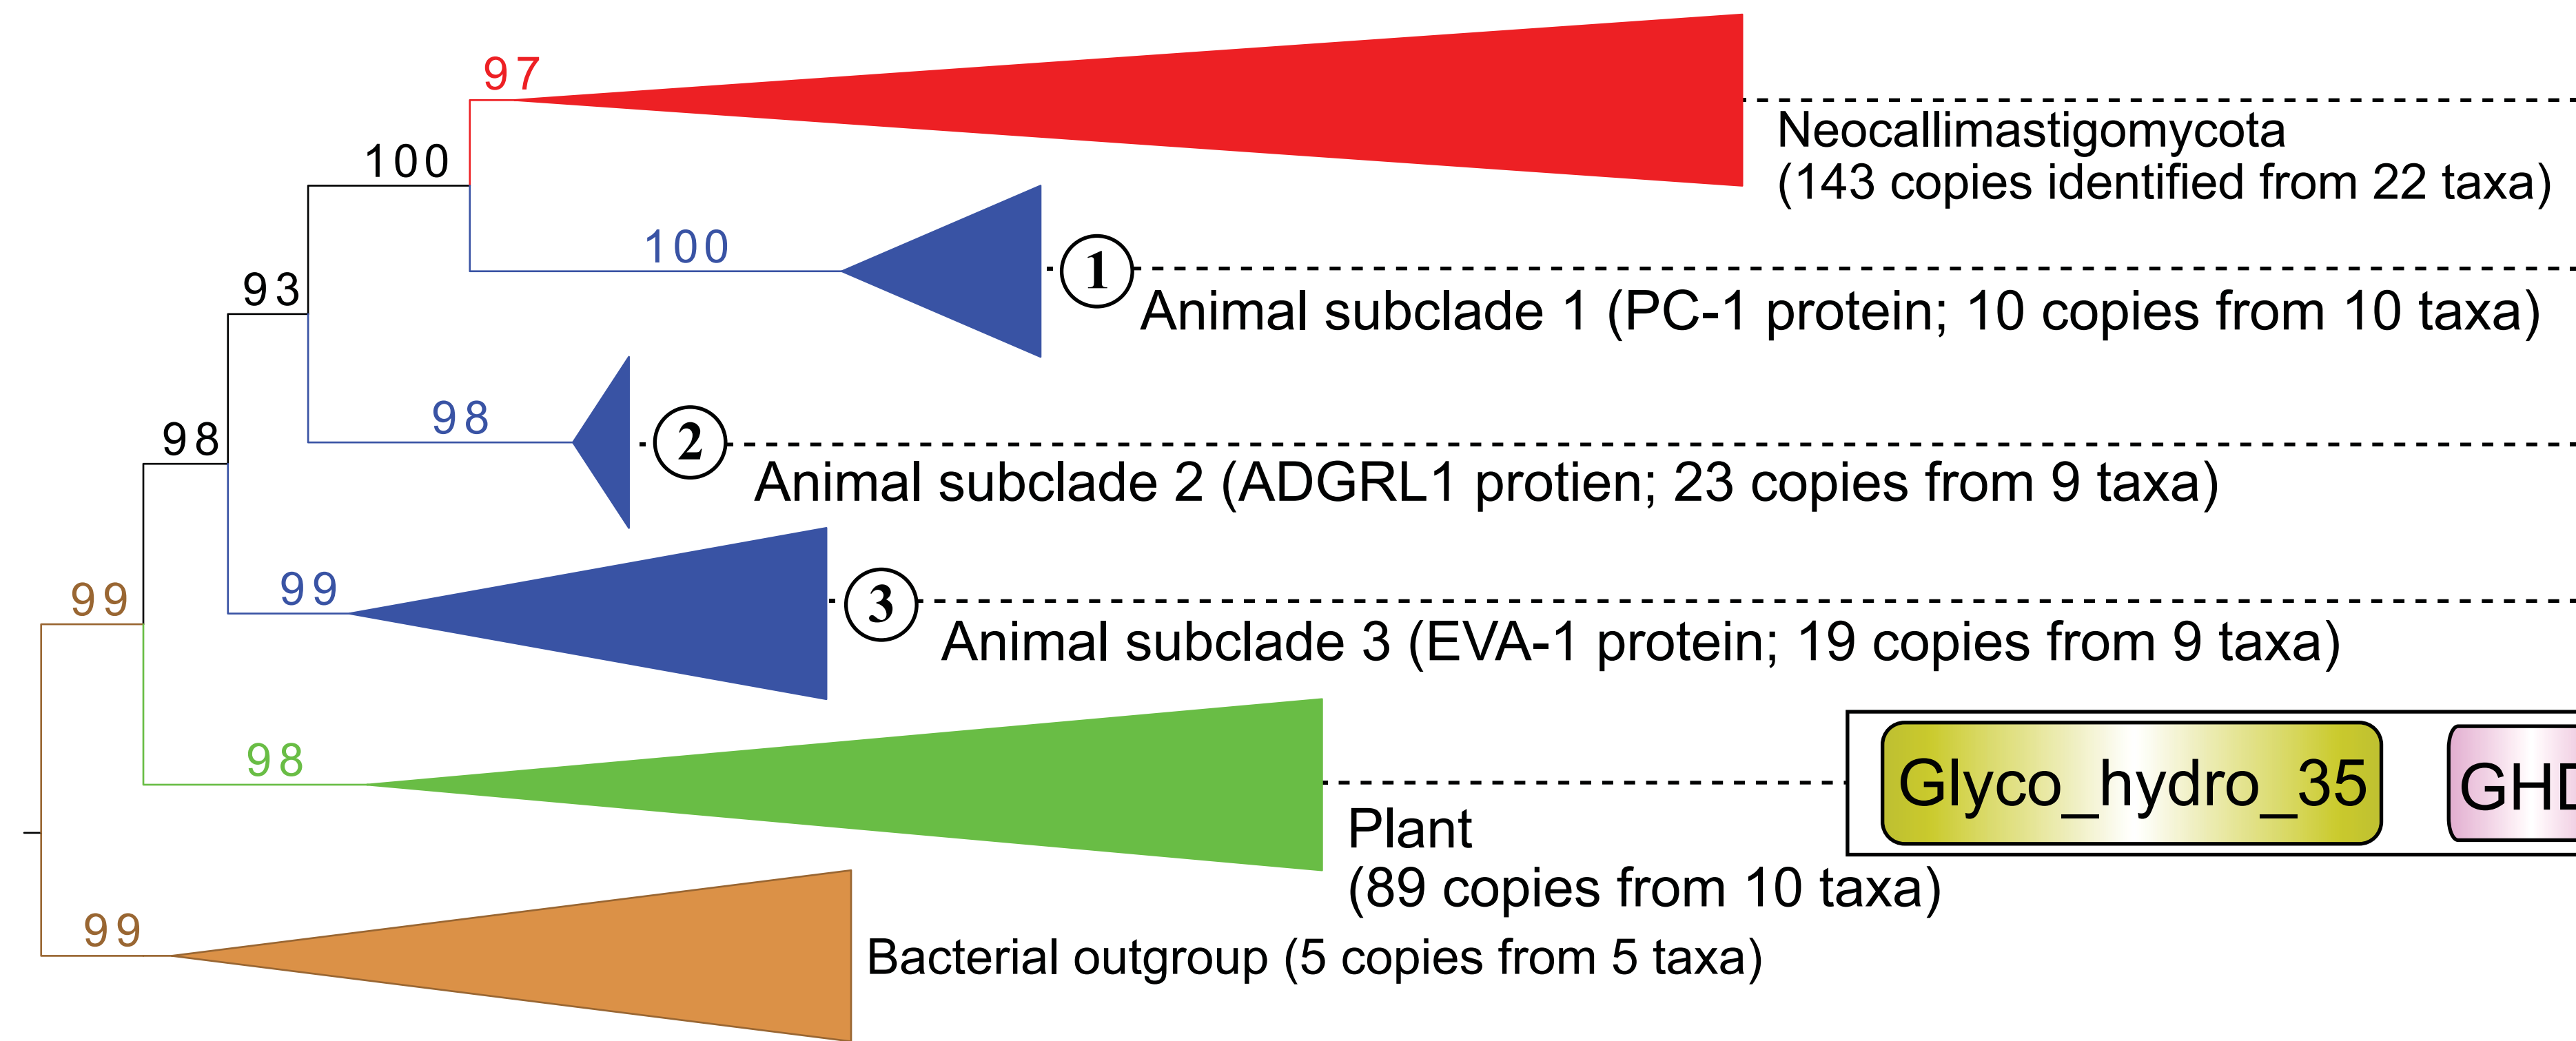

(b)

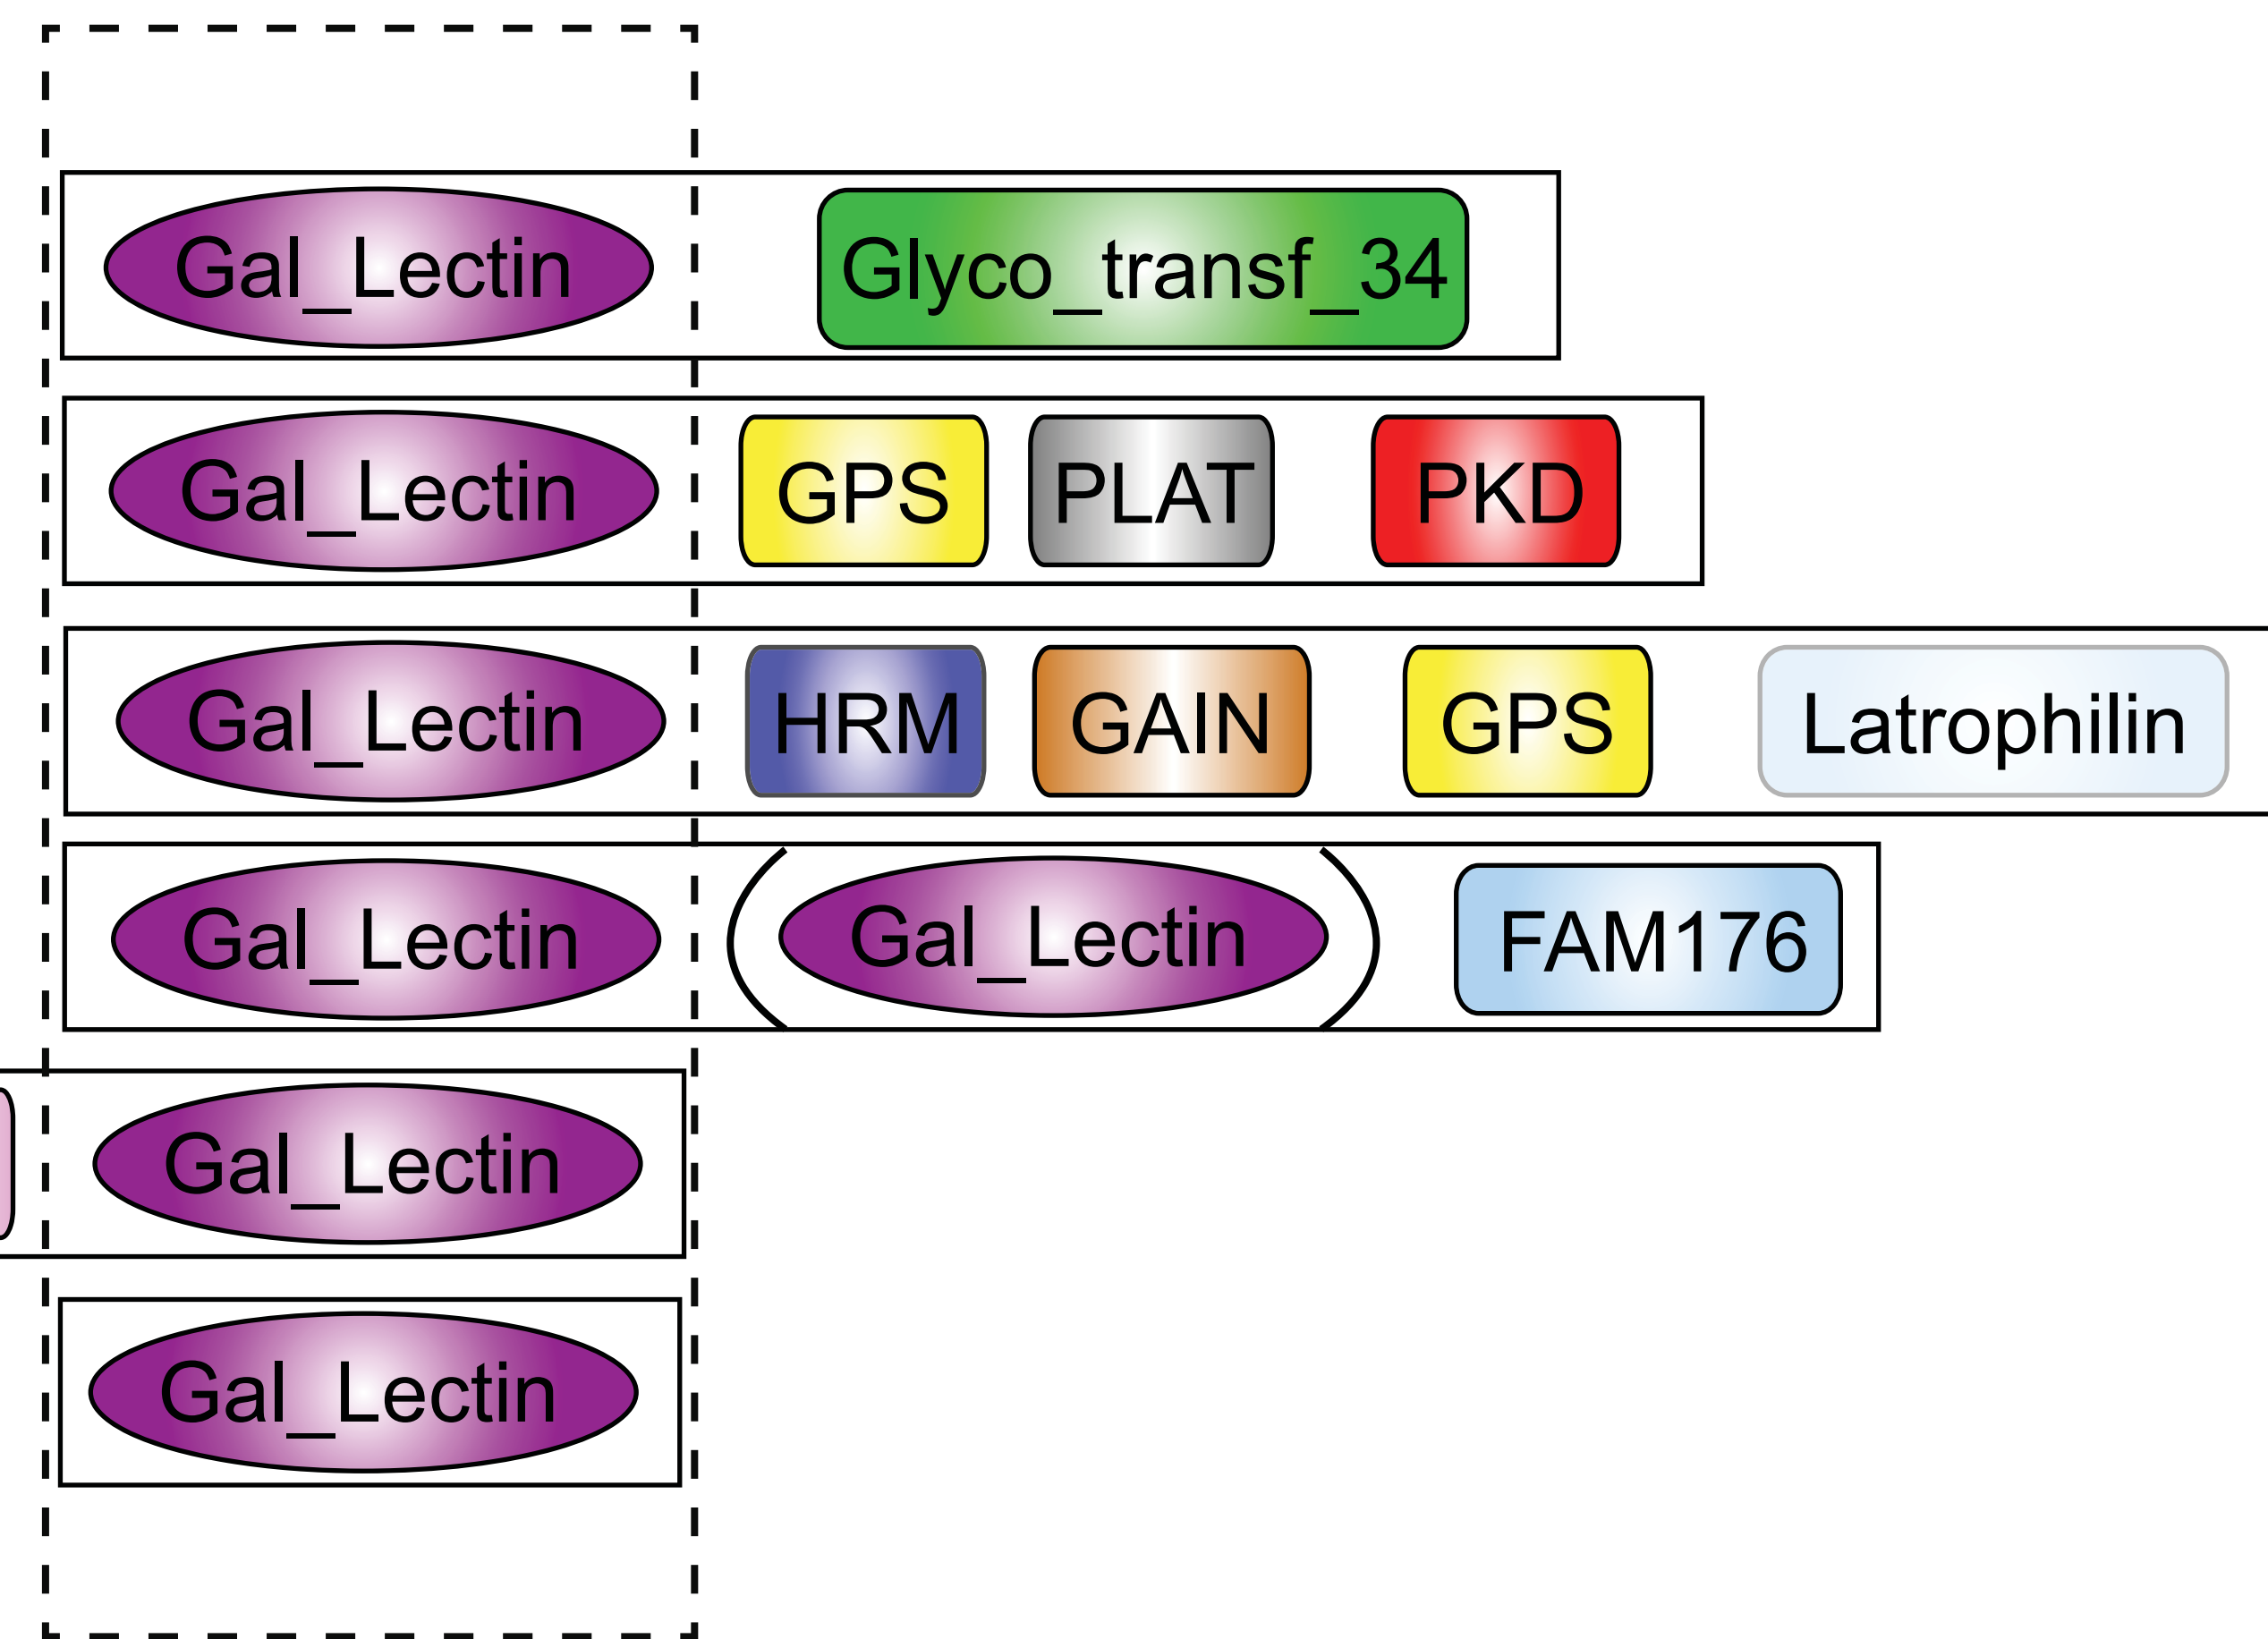

0.6

Unspecified domain from **Dikarya**  
(including Rhamnogalacturonate  
lyase B & C)

“RhgB\_N” from  
**Dikarya**, **Oomycetes**, and Bacteria  
(including Rhamnogalacturonate  
lyase A)

“Rhamnogal\_lyase”  
from Bacterial group I

Unspecified  
domain  
from Bacteria

Unspecified domain  
from **Dikarya**

“RhgB\_N” from Bacteria

Unspecified domain  
from Bacteria

“Rhamnogal\_lyase”  
from Bacterial group II  
(with HGT in **Insects**)

“Rhamnogal\_lyase” from  
**Neocallimastigomycota** (Novel)

**Legend:**

- The only two Pfam domains involved in the rhamnogalactoside degrading enzymes (polysaccharide lyase family 4):
1. “Rhamnogal\_lyase”: previously only been found from plants and plant pathogenic bacteria.
  2. “RhgB\_N”: widely identified from bacteria, fungi, and oomycetes.

“Rhamnogal\_lyase”  
from **Plant**

Table 1. Information for the AGF strains included in this study.

| Genus                 | Species                           | Strain | Accession No.  | Type          | Host     |
|-----------------------|-----------------------------------|--------|----------------|---------------|----------|
| <i>Anaeromyces</i>    | <i>Anaeromyces contortous</i>     | Na     | GGWN00000000   | Transcriptome | Cow      |
| <i>Anaeromyces</i>    | <i>Anaeromyces contortous</i>     | C3J    | GGWO00000000   | Transcriptome | Cow      |
| <i>Anaeromyces</i>    | <i>Anaeromyces contortous</i>     | G3G    | GGWR00000000   | Transcriptome | Goat     |
| <i>Anaeromyces</i>    | <i>Anaeromyces contortous</i>     | O2     | GGWQ00000000   | Transcriptome | Cow      |
| <i>Anaeromyces</i>    | <i>Anaeromyces contortous</i>     | C3G    | GGWR00000000   | Transcriptome | Cow      |
| <i>Anaeromyces</i>    | <i>Anaeromyces robustus</i>       | S4     | MCFG00000000.1 | Genome        | Sheep    |
| <i>Caecomyces</i>     | <i>Caecomyces</i> sp.             | Brit4  | GGWS00000000   | Transcriptome | Cow      |
| <i>Caecomyces</i>     | <i>Caecomyces</i> sp.             | Iso3   | GGXE00000000   | Transcriptome | Cow      |
| <i>Feromyces</i>      | <i>Feromyces austinii</i>         | WSF3a  | GGWU00000000   | Transcriptome | Aoudad   |
| <i>Feromyces</i>      | <i>Feromyces austinii</i>         | WSF2c  | GGWT00000000   | Transcriptome | Aoudad   |
| <i>Orpinomyces</i>    | <i>Orpinomyces</i> sp.            | D3A    | GGWV00000000   | Transcriptome | Cow      |
| <i>Orpinomyces</i>    | <i>Orpinomyces</i> sp.            | D3B    | GGWW00000000   | Transcriptome | Cow      |
| <i>Orpinomyces</i>    | <i>Orpinomyces</i> sp.            | D4C    | GGWX00000000   | Transcriptome | Cow      |
| <i>Pecoramyces</i>    | <i>Pecoramyces ruminantium</i>    | C1A    | ASRE00000000.1 | Genome        | Cow      |
| <i>Pecoramyces</i>    | <i>Piromyces</i> sp.              | S4B    | GGWY00000000   | Transcriptome | Sheep    |
| <i>Pecoramyces</i>    | <i>Piromyces</i> sp.              | FX4B   | GGWZ00000000   | Transcriptome | Cow      |
| <i>Pecoramyces</i>    | <i>Piromyces</i> sp.              | FS3c   | GGXF00000000   | Transcriptome | Cow      |
| <i>Pecoramyces</i>    | <i>Piromyces</i> sp.              | YC3    | GGXA00000000   | Transcriptome | Cow      |
| <i>Piromyces</i>      | <i>Piromyces finnis</i>           | Pirfi3 | MCFH00000000.1 | Genome        | Horse    |
| <i>Piromyces</i>      | <i>Piromyces</i> sp.              | E2     | MCNC00000000.1 | Genome        | Elephant |
| <i>Piromyces</i>      | <i>Piromyces</i> sp.              | A1     | GGXB00000000   | Transcriptome | Sheep    |
| <i>Piromyces</i>      | <i>Piromyces</i> sp.              | B4     | GGXH00000000   | Transcriptome | Cow      |
| <i>Piromyces</i>      | <i>Piromyces</i> sp.              | B5     | GGXI00000000   | Transcriptome | Cow      |
| <i>Neocallimastix</i> | <i>Neocallimastix californiae</i> | G1     | MCOG00000000.1 | Genome        | Goat     |
| <i>Neocallimastix</i> | <i>Neocallimastix frontalis</i>   | Hef5   | GGXJ00000000   | Transcriptome | Cow      |
| <i>Neocallimastix</i> | <i>Neocallimastix</i> sp.         | G3     | GGXC00000000   | Transcriptome | Sheep    |

Table 2. Distribution of the three studied domains in the fungal kingdom.

|                       | Number of<br>examined Genomes | No.<br>"Cthe_2159" | No.<br>"Gal_Lectin" | No.<br>"Rhamnagal_lyase" |
|-----------------------|-------------------------------|--------------------|---------------------|--------------------------|
| Ascomycota            | 652                           | 0                  | 0                   | 0                        |
| Basidiomycota         | 324                           | 0                  | 0                   | 0                        |
| Mucoromycota          | 76                            | 0                  | 0                   | 0                        |
| Zoopagomycota         | 23                            | 0                  | 0                   | 0                        |
| Chytridiomycota       | 14                            | 0                  | 0                   | 0                        |
| Blastocladiomycota    | 4                             | 0                  | 0                   | 0                        |
| Cryptomycota          | 1                             | 0                  | 0                   | 0                        |
| Microsporidia         | 22                            | 0                  | 0                   | 0                        |
| Neocallimastigomycota | 5                             | 95                 | 67                  | 26                       |
| Total                 | 1121                          |                    |                     |                          |
